# Supplementary material for: Bioactive Monoterpenes and Polyketides from the Ascidian-Derived Fungus Diaporthe sp. SYSU-MS4722
Source: MDPI journal article supplement (doi:10.3390/md20090553), 2022-08-29
Supplement: s1 [file s1]

## Supporting Information

### Bioactive monoterpenes and polyketides from the ascidian-derived fungus *Diaporthe* sp. SYSU-MS4722

Guifa Zhai<sup>1,2</sup>, Senhua Chen<sup>1,3\*</sup>, Hongjie Shen<sup>1,3</sup>, Heng Guo<sup>1</sup>, Minghua Jiang<sup>1,3</sup>, and Lan Liu<sup>1,3,4\*</sup>

<sup>1</sup> School of Marine Sciences, Sun Yat-sen University, Zhuhai 519000, China; zhaigf@mail.sysu.edu.cn; shenhj5@mail2.sysu.edu.cn; hengeguo163@163.com; jiangmh23@mail2.sysu.edu.cn;

<sup>2</sup> School of Medicine, Shenzhen Campus of Sun Yat-Sen University, Shenzhen 518107, China

<sup>3</sup> Southern Laboratory of Ocean Science and Engineering (Guangdong, Zhuhai), Zhuhai 519000, China

<sup>4</sup> Pearl River Estuary Marine Ecosystem Research Station, Ministry of Education, Zhuhai 519082, China.

\* Correspondence: chensenh@mail.sysu.edu.cn; cesllan@mail.sysu.edu.cn; Tel.:020-84725459.

|                                                                                                        |    |
|--------------------------------------------------------------------------------------------------------|----|
| Figure S1. The HRESIMS spectrum of compound 1.....                                                     | 3  |
| Figure S2. The <sup>1</sup> H NMR (400MHz) spectrum of compound 1 in CD <sub>3</sub> OD.....           | 3  |
| Figure S3. The <sup>13</sup> C NMR (100MHz) spectrum of compound 1 in CD <sub>3</sub> OD.....          | 4  |
| Figure S4. The HSQC spectrum of compound 1 in CD <sub>3</sub> OD. ....                                 | 4  |
| Figure S5. The <sup>1</sup> H- <sup>1</sup> H COSY spectrum of compound 1 in CD <sub>3</sub> OD. ....  | 5  |
| Figure S6. The HMBC spectrum of compound 1 in CD <sub>3</sub> OD. ....                                 | 5  |
| Figure S7. The NOESY spectrum of compound 1 in CD <sub>3</sub> OD.....                                 | 6  |
| Figure S8. IR spectrum of compound 1. ....                                                             | 6  |
| Figure S9. The HRESIMS spectrum of compound 2.....                                                     | 7  |
| Figure S10. The <sup>1</sup> H NMR (600MHz) spectrum of compound 2 in CD <sub>3</sub> OD.....          | 7  |
| Figure S11. The <sup>13</sup> C NMR (150MHz) spectrum of compound 2 in CD <sub>3</sub> OD.....         | 8  |
| Figure S12. The HSQC spectrum of compound 2 in CD <sub>3</sub> OD. ....                                | 8  |
| Figure S13. The <sup>1</sup> H- <sup>1</sup> H COSY spectrum of compound 2 in CD <sub>3</sub> OD. .... | 9  |
| Figure S14. The HMBC spectrum of compound 2 in CD <sub>3</sub> OD. ....                                | 9  |
| Figure S15. The NOESY spectrum of compound 2 in CD <sub>3</sub> OD.....                                | 10 |
| Figure S16. IR spectrum of compound 2 in CD <sub>3</sub> OD. ....                                      | 10 |
| Figure S17. The HRESIMS spectrum of compound 3.....                                                    | 11 |
| Figure S18. The <sup>1</sup> H NMR (400MHz) spectrum of compound 3 in CD <sub>3</sub> OD.....          | 11 |
| Figure S19. The <sup>13</sup> C NMR (100MHz) spectrum of compound 3 in CD <sub>3</sub> OD.....         | 12 |

|                                                                                                                                                              |    |
|--------------------------------------------------------------------------------------------------------------------------------------------------------------|----|
| <b>Figure S20.</b> The HSQC spectrum of compound <b>3</b> in CD <sub>3</sub> OD. ....                                                                        | 12 |
| <b>Figure S21.</b> The <sup>1</sup> H- <sup>1</sup> H COSY spectrum of compound <b>3</b> in CD <sub>3</sub> OD. ....                                         | 13 |
| <b>Figure S22.</b> The HMBC spectrum of compound <b>3</b> in CD <sub>3</sub> OD. ....                                                                        | 13 |
| <b>Figure S23.</b> IR spectrum of compound <b>3</b> . ....                                                                                                   | 14 |
| <b>Figure S24.</b> The HRESIMS spectrum of compound <b>6</b> . ....                                                                                          | 14 |
| <b>Figure S25.</b> The <sup>1</sup> H NMR (400MHz) spectrum of compound <b>6</b> in CD <sub>3</sub> OD. ....                                                 | 15 |
| <b>Figure S26.</b> The <sup>13</sup> C NMR (100MHz) spectrum of compound <b>6</b> in CD <sub>3</sub> OD. ....                                                | 15 |
| <b>Figure S27.</b> The HSQC spectrum of compound <b>6</b> in CD <sub>3</sub> OD. ....                                                                        | 16 |
| <b>Figure S28.</b> The <sup>1</sup> H- <sup>1</sup> H COSY spectrum of compound <b>6</b> in CD <sub>3</sub> OD. ....                                         | 16 |
| <b>Figure S29.</b> The HMBC spectrum of compound <b>6</b> in CD <sub>3</sub> OD. ....                                                                        | 17 |
| <b>Figure S30.</b> The NOESY spectrum of compound <b>6</b> in CD <sub>3</sub> OD. ....                                                                       | 17 |
| <b>Figure S31.</b> IR spectrum of compound <b>6</b> . ....                                                                                                   | 18 |
| <b>Figure S32.</b> Linear correlation between the experimental <sup>13</sup> C NMR chemical shifts for <b>2</b> . ....                                       | 18 |
| <b>Figure S33.</b> The DP4 probability analysis ....                                                                                                         | 19 |
| Table S1. Energy of all conformers of compound <b>2</b> . ....                                                                                               | 19 |
| Figure S34. wB97XD/TZVP optimized low-energy conformers of compound <b>2</b> . ....                                                                          | 21 |
| Table S2. Cartesian coordinates of the low-energy reoptimized conformers of <b>2</b> calculated at PBE1PBE/TZVP level of theory in IEFPCM for methanol. .... | 21 |

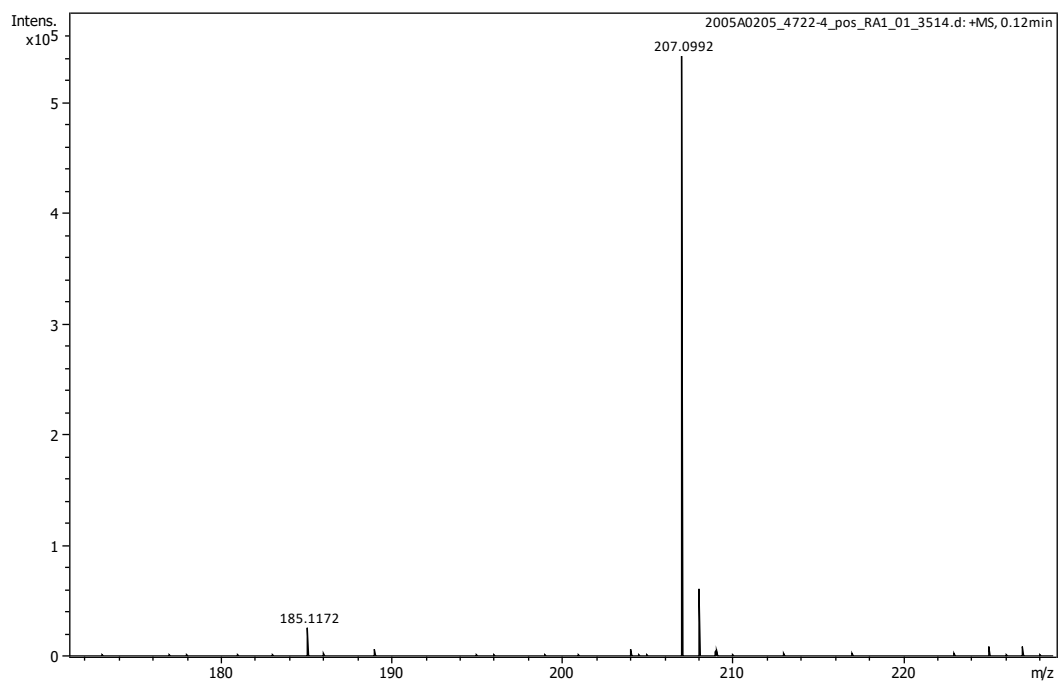

| Meas. m/z | Ion Formula | m/z      | z  | err [ppm] | err [mDa] | mSigma | rdb | e <sup>-</sup> Conf | N-Rule |
|-----------|-------------|----------|----|-----------|-----------|--------|-----|---------------------|--------|
| 185.1172  | C10H17O3    | 185.1172 | 1+ | 0         | 0         | 8.7    | 3   | even                | ok     |
| 207.0992  | C10H16NaO3  | 207.0992 | 1+ | -0.1      | 0         | 1.7    | 3   | even                | ok     |

**Figure S1.** The HRESIMS spectrum of compound **1**.

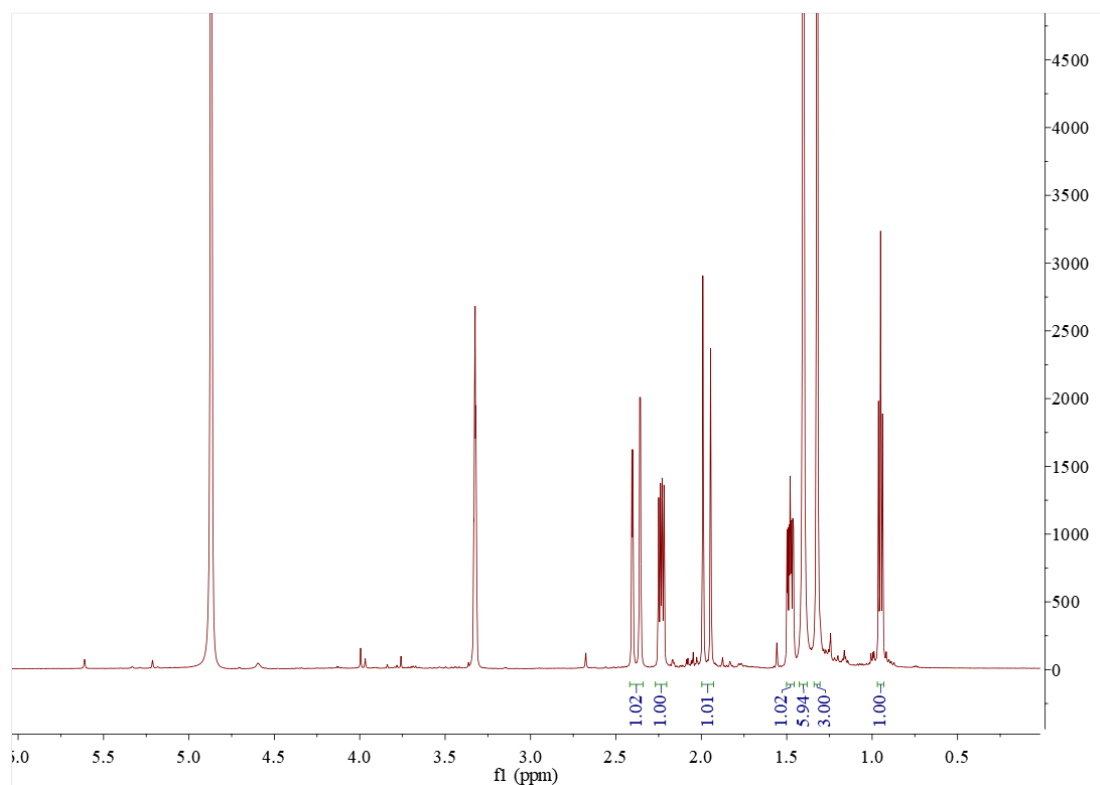

**Figure S2.** The <sup>1</sup>H NMR (400MHz) spectrum of compound **1** in CD<sub>3</sub>OD.

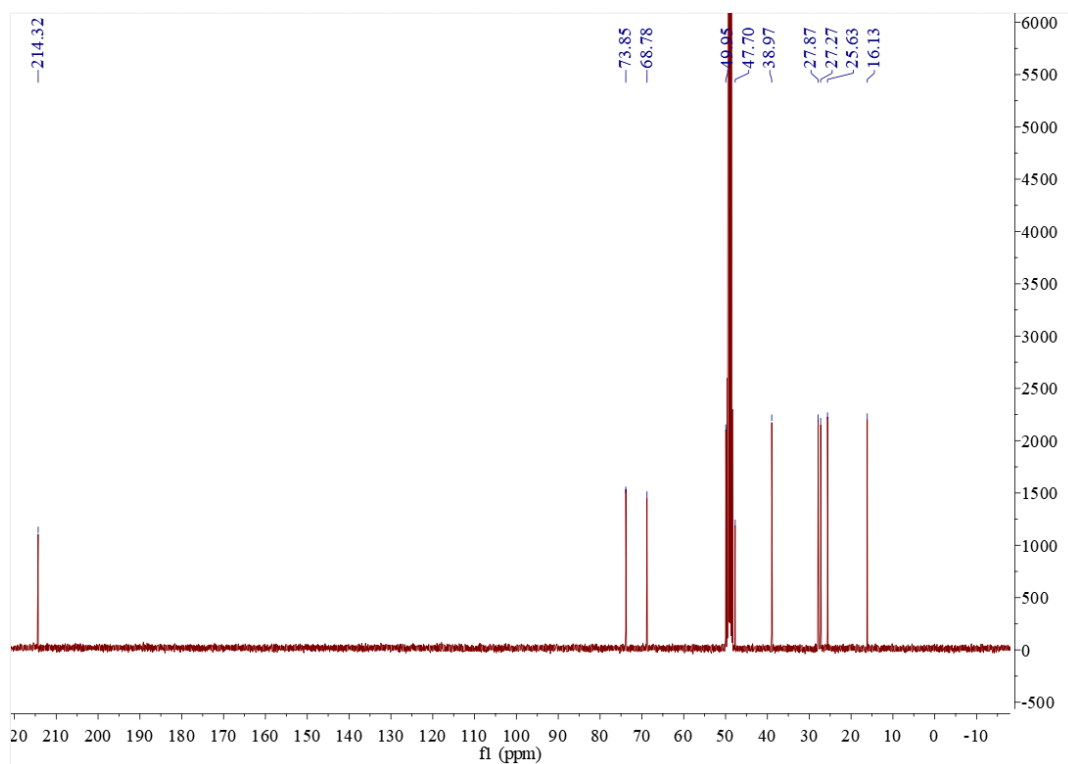

**Figure S3.** The <sup>13</sup>C NMR (100MHz) spectrum of compound **1** in CD<sub>3</sub>OD.

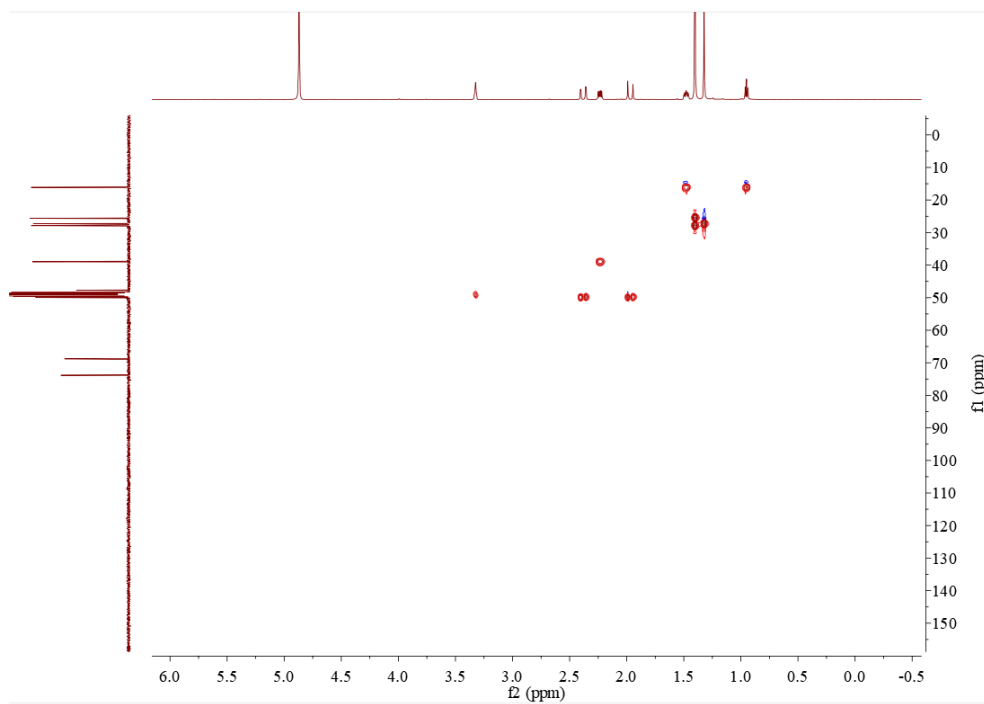

**Figure S4.** The HSQC spectrum of compound **1** in CD<sub>3</sub>OD.

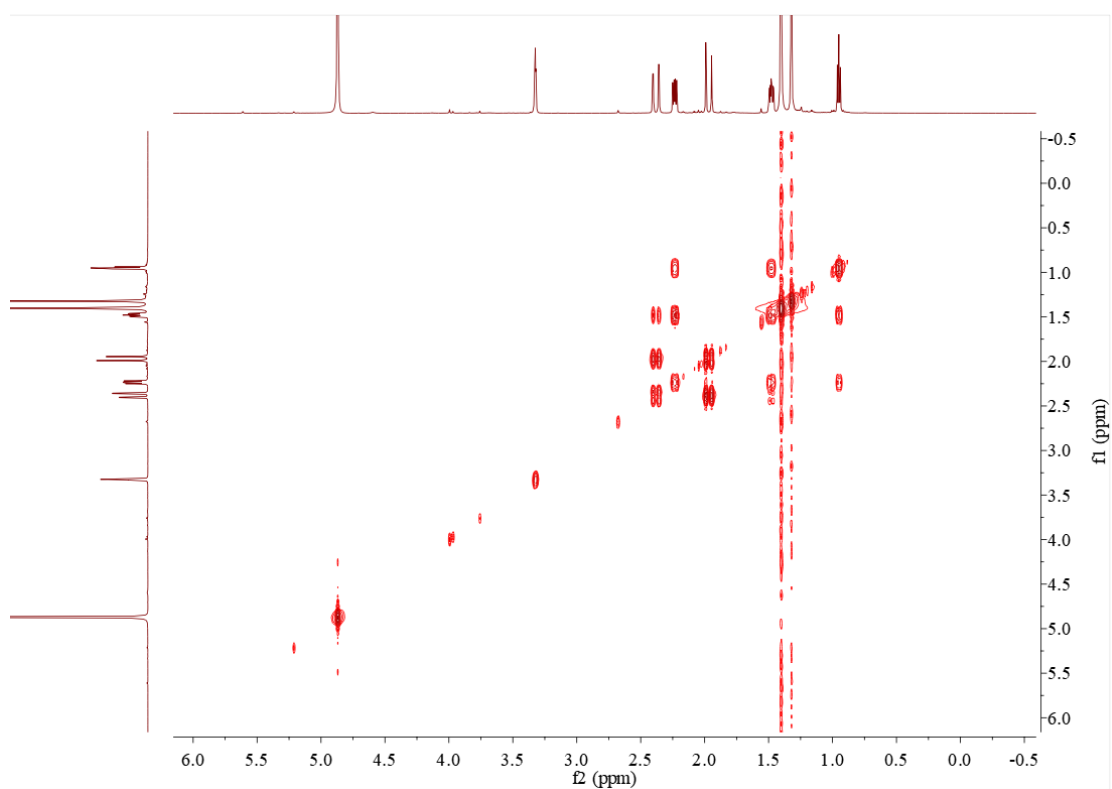

**Figure S5.** The  $^1\text{H}$ - $^1\text{H}$  COSY spectrum of compound **1** in  $\text{CD}_3\text{OD}$ .

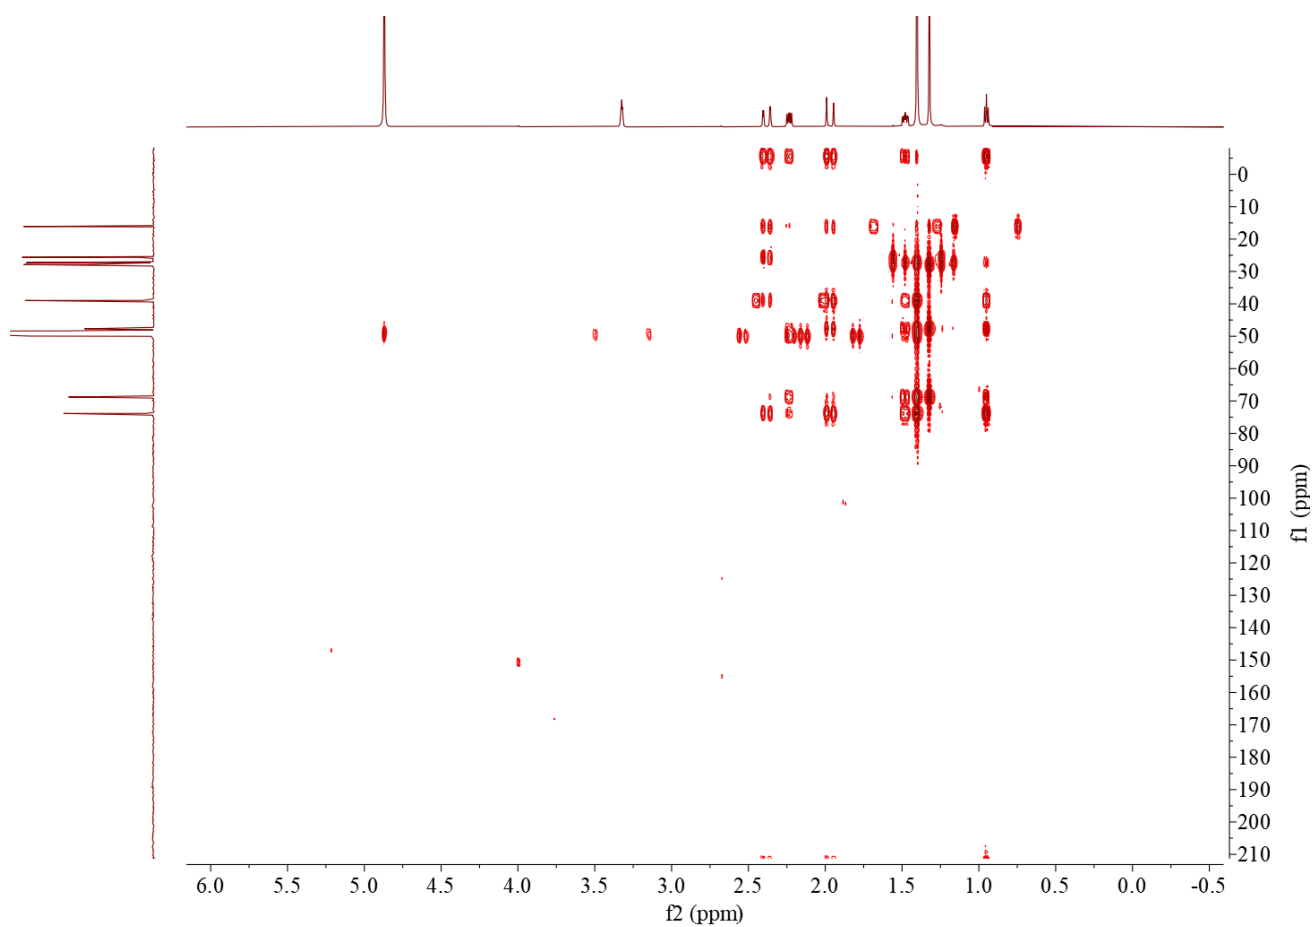

**Figure S6.** The HMBC spectrum of compound **1** in  $\text{CD}_3\text{OD}$ .

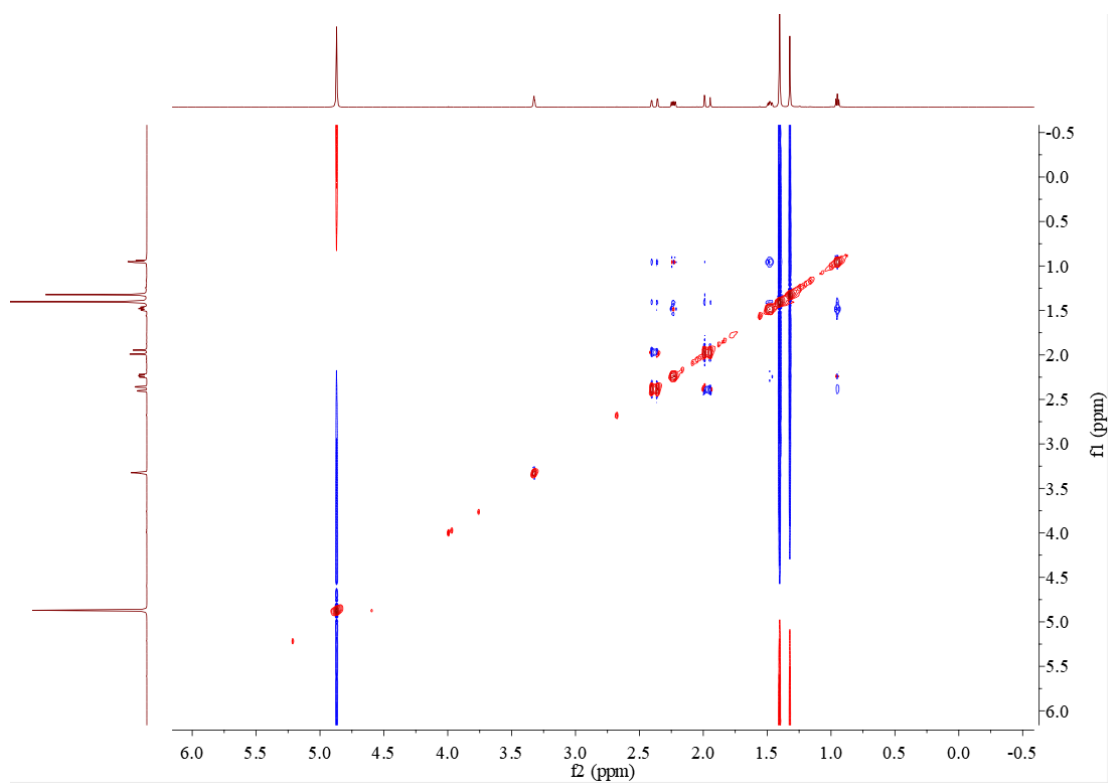

**Figure S7.** The NOESY spectrum of compound **1** in CD<sub>3</sub>OD.

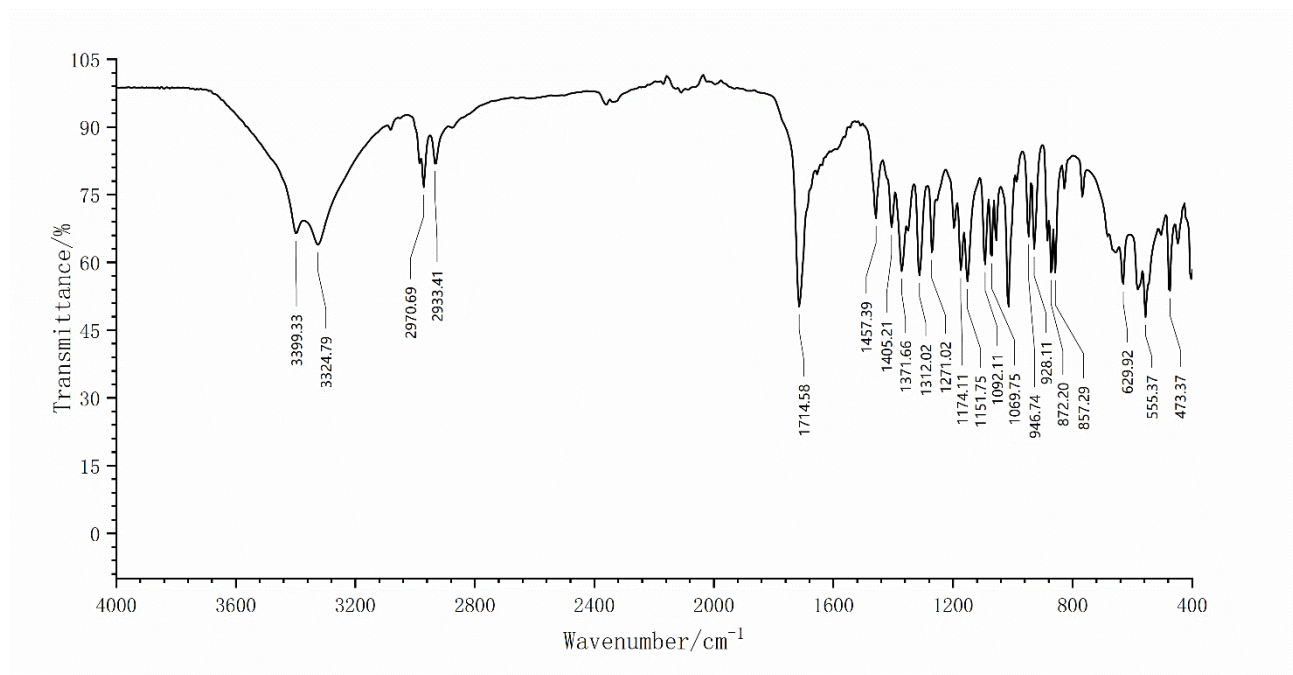

**Figure S8.** IR spectrum of compound **1**.

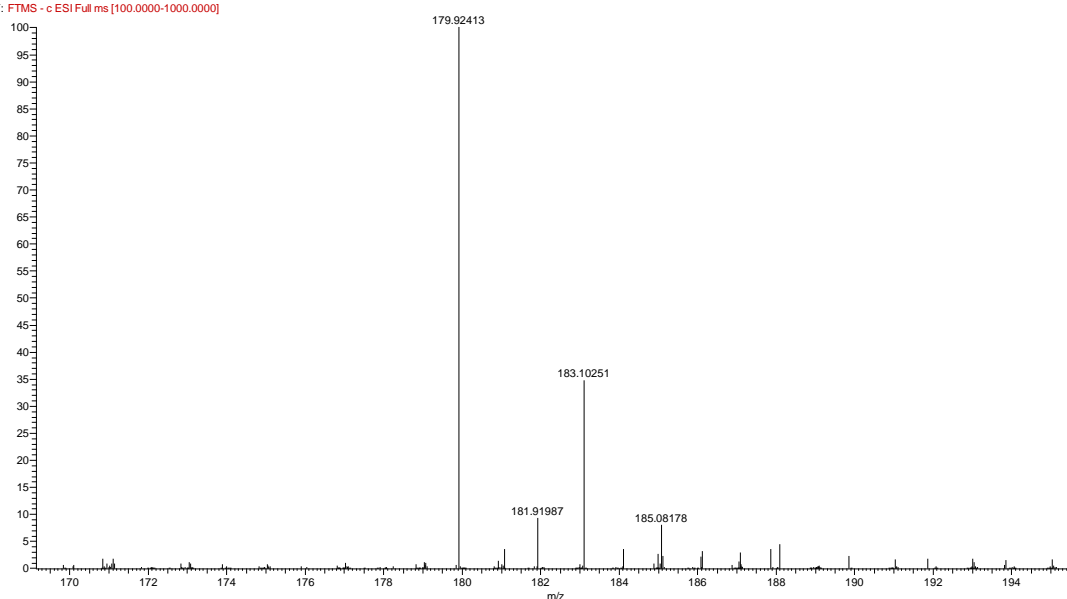

SPECTRUM - simulation :

| m/z       | Theo. Mass | Delta (ppm) | RDB equiv. | Composition |
|-----------|------------|-------------|------------|-------------|
| 183.10251 | 183.10267  | -0.86       | 3.5        | C10 H15 O3  |

**Figure S9.** The HRESIMS spectrum of compound **2**.

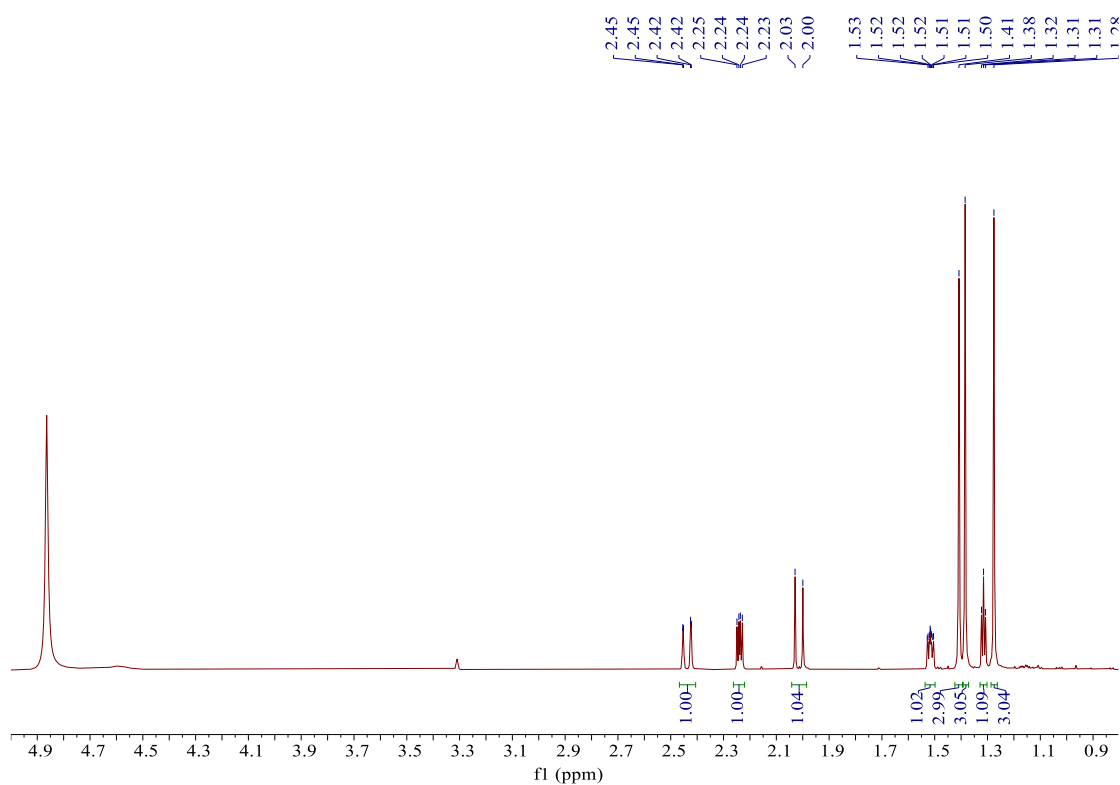

**Figure S10.** The <sup>1</sup>H NMR (600MHz) spectrum of compound **2** in CD<sub>3</sub>OD.

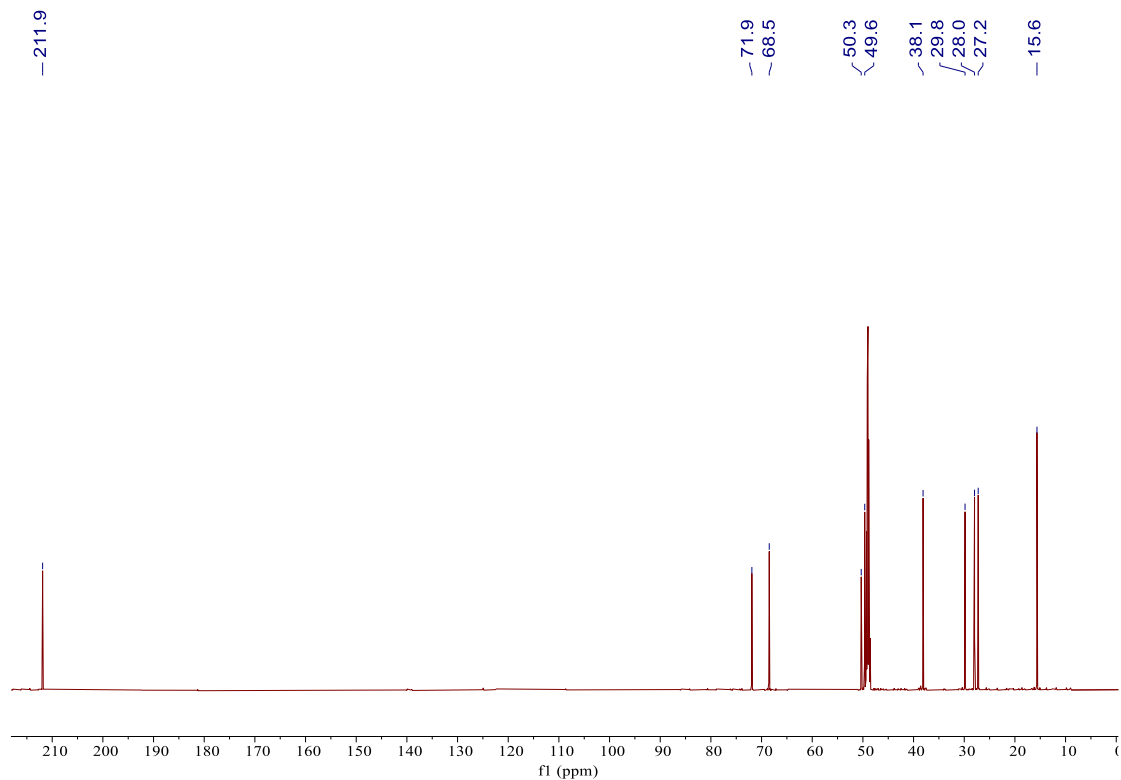

**Figure S11.** The  $^{13}\text{C}$  NMR (150MHz) spectrum of compound **2** in  $\text{CD}_3\text{OD}$ .

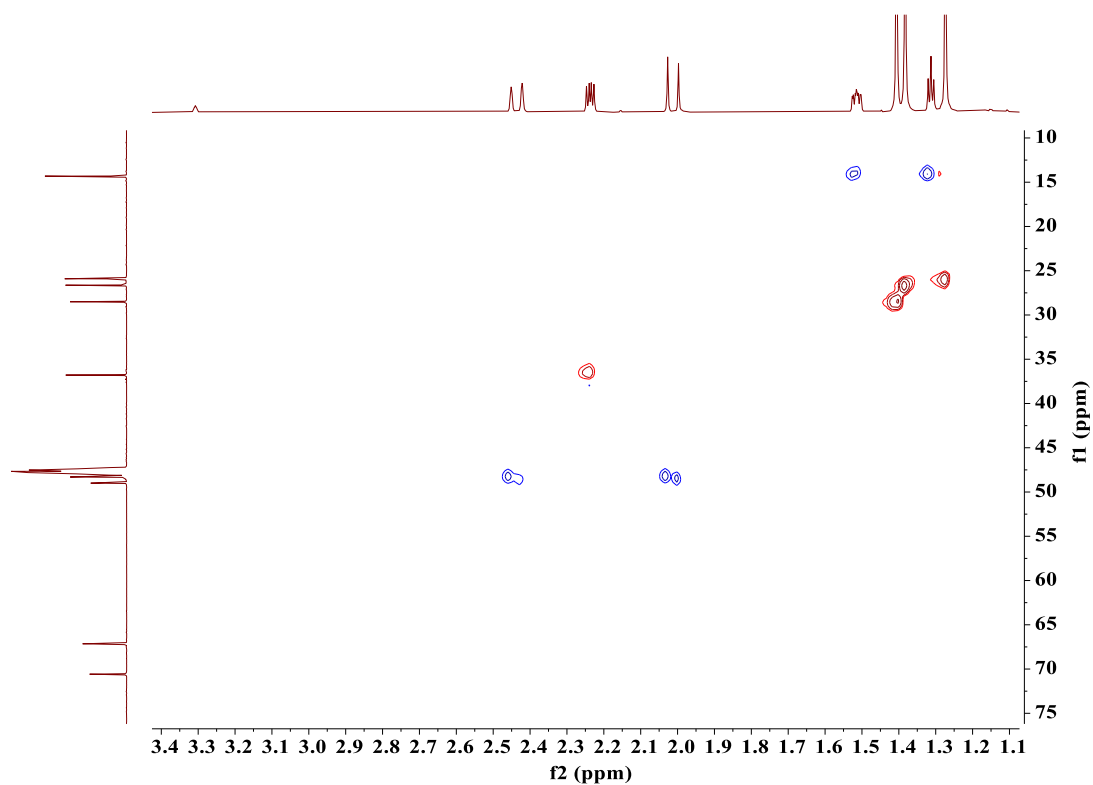

**Figure S12.** The HSQC spectrum of compound **2** in  $\text{CD}_3\text{OD}$ .

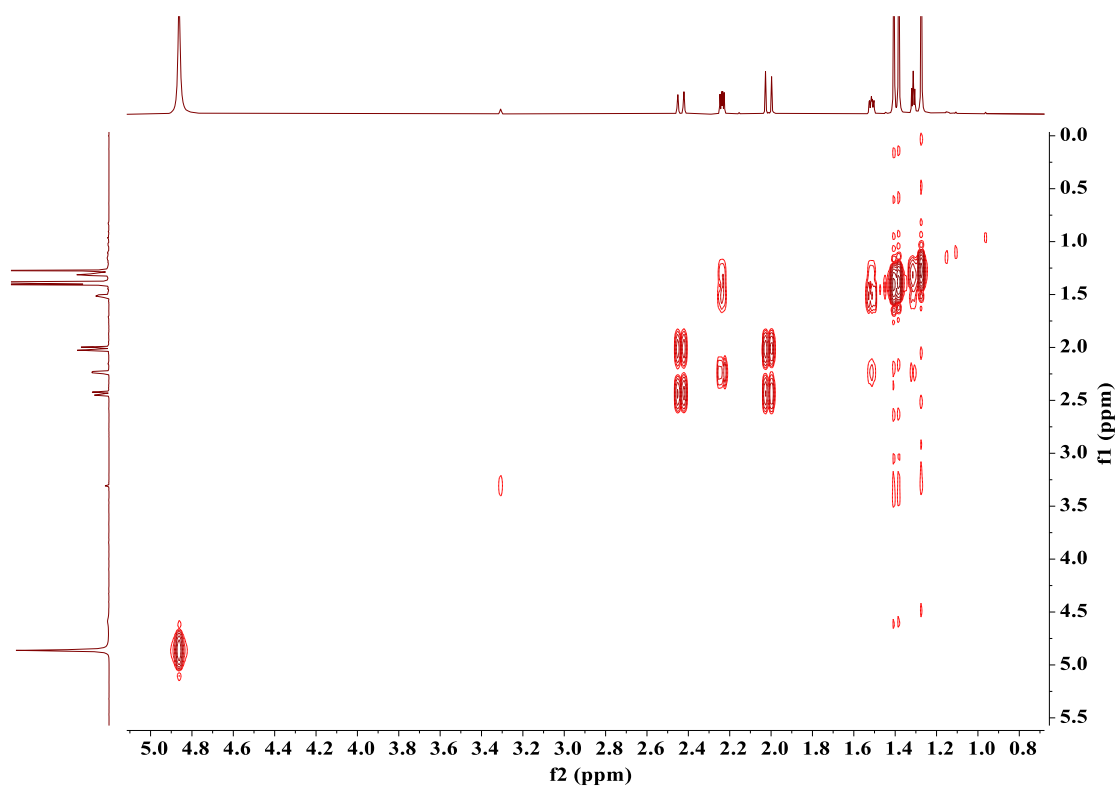

**Figure S13.** The  $^1\text{H}$ - $^1\text{H}$  COSY spectrum of compound **2** in  $\text{CD}_3\text{OD}$ .

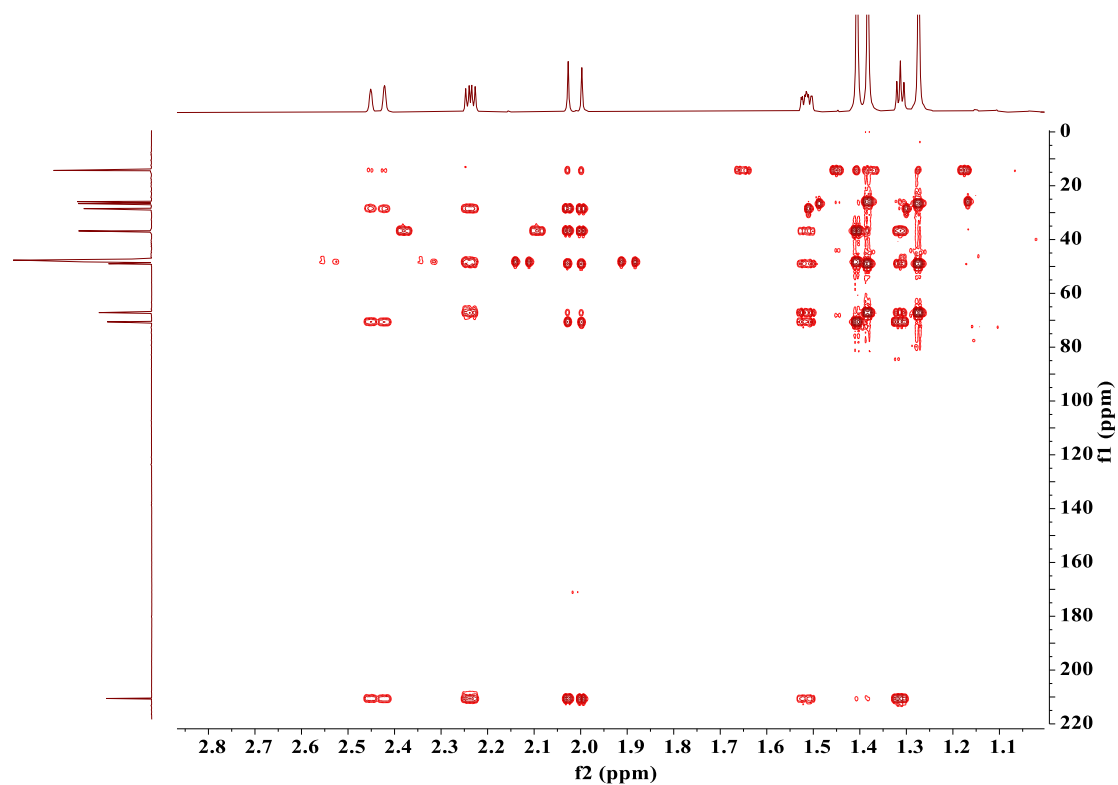

**Figure S14.** The HMBC spectrum of compound **2** in  $\text{CD}_3\text{OD}$ .

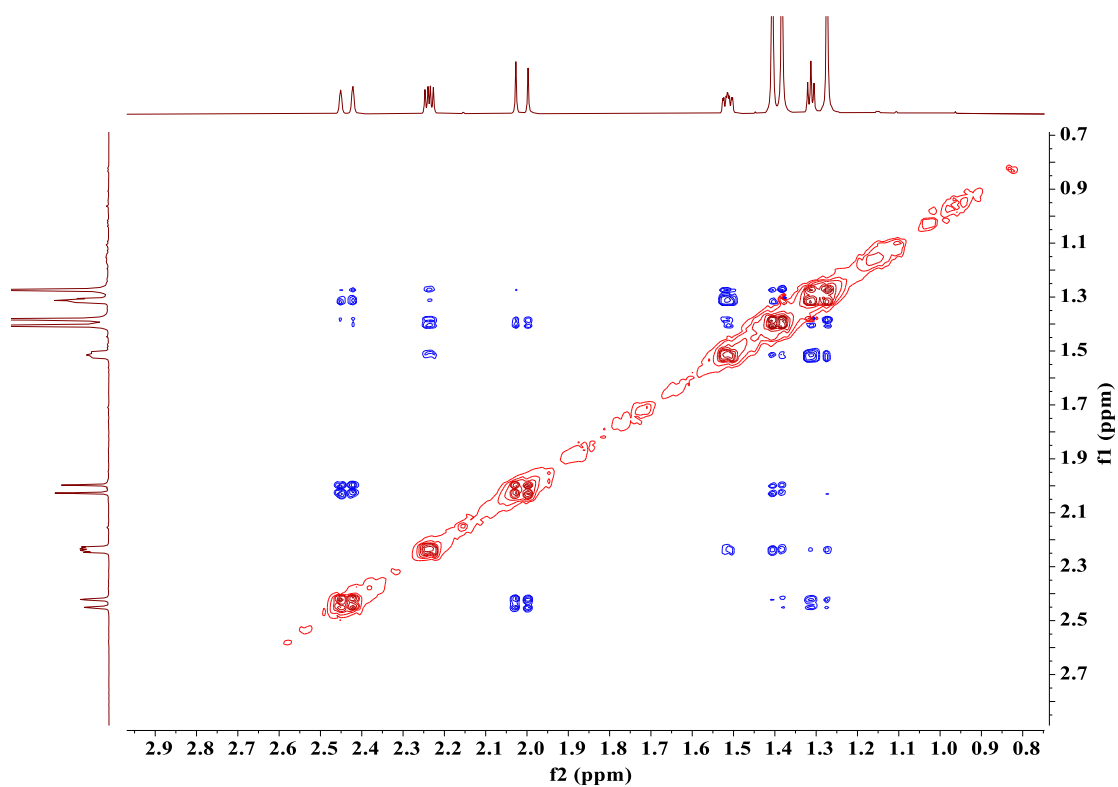

**Figure S15.** The NOESY spectrum of compound **2** in CD<sub>3</sub>OD.

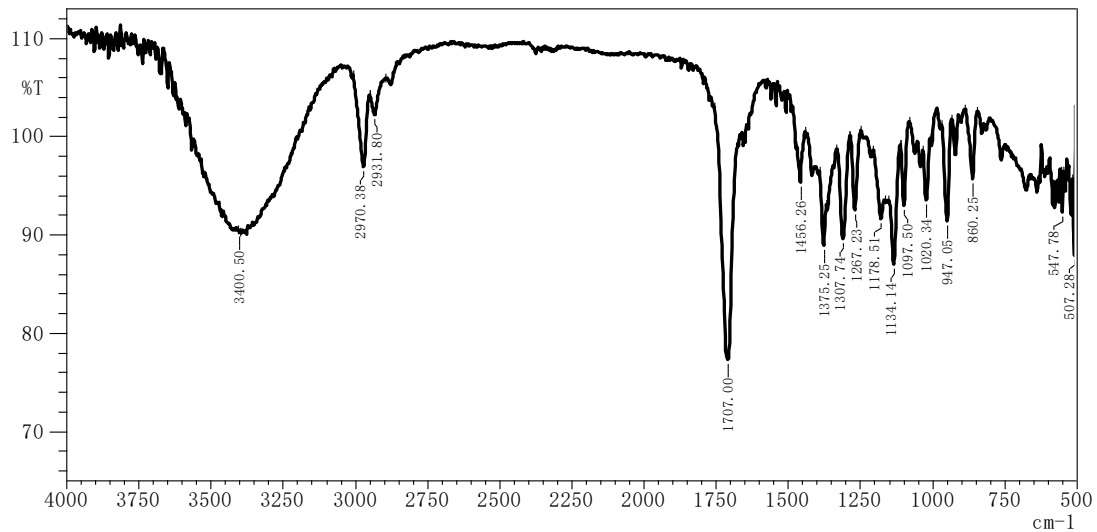

**Figure S16.** IR spectrum of compound **2** in CD<sub>3</sub>OD.

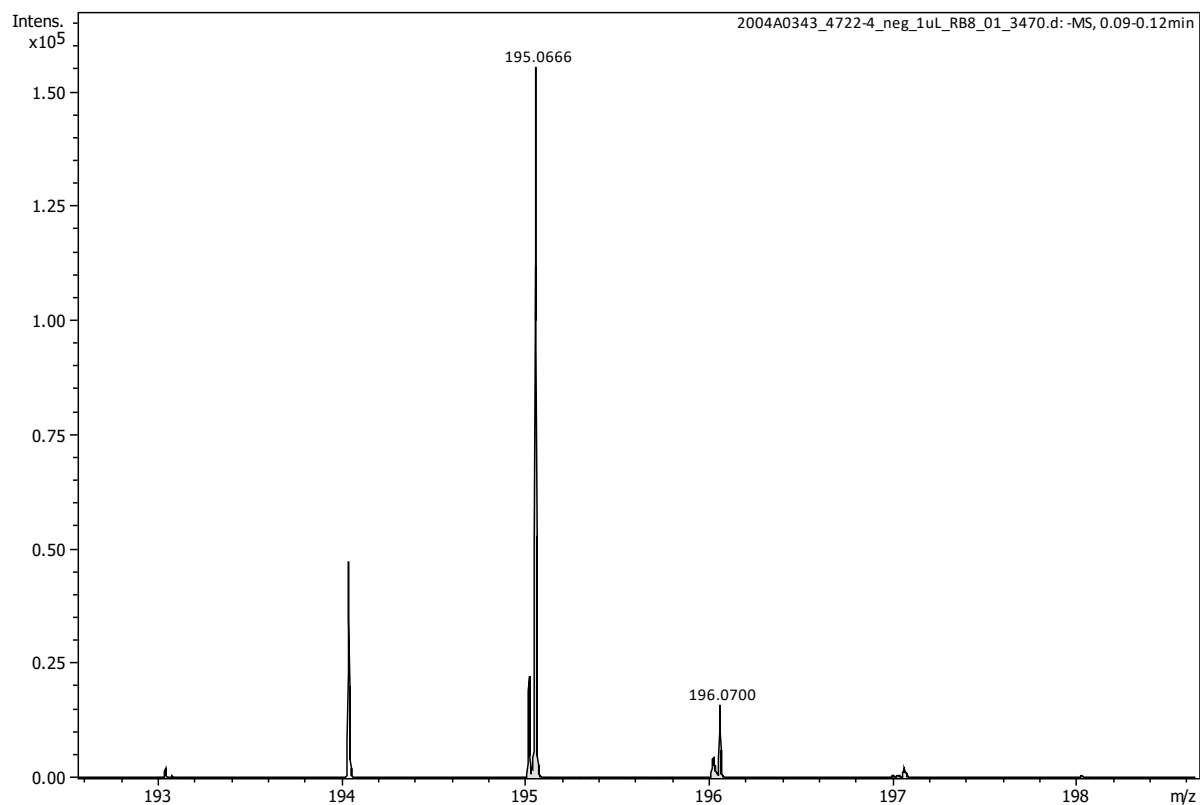

| Meas. m/z | Ion Formula | m/z      | z  | err [ppm] | err [mDa] | mSigma | rdb | e <sup>-</sup> Conf | N-Rule |
|-----------|-------------|----------|----|-----------|-----------|--------|-----|---------------------|--------|
| 195.0666  | C10H11O4    | 195.0663 | 1- | -1.8      | -0.3      | 4.4    | 5   | even                | ok     |

**Figure S17.** The HRESIMS spectrum of compound **3**.

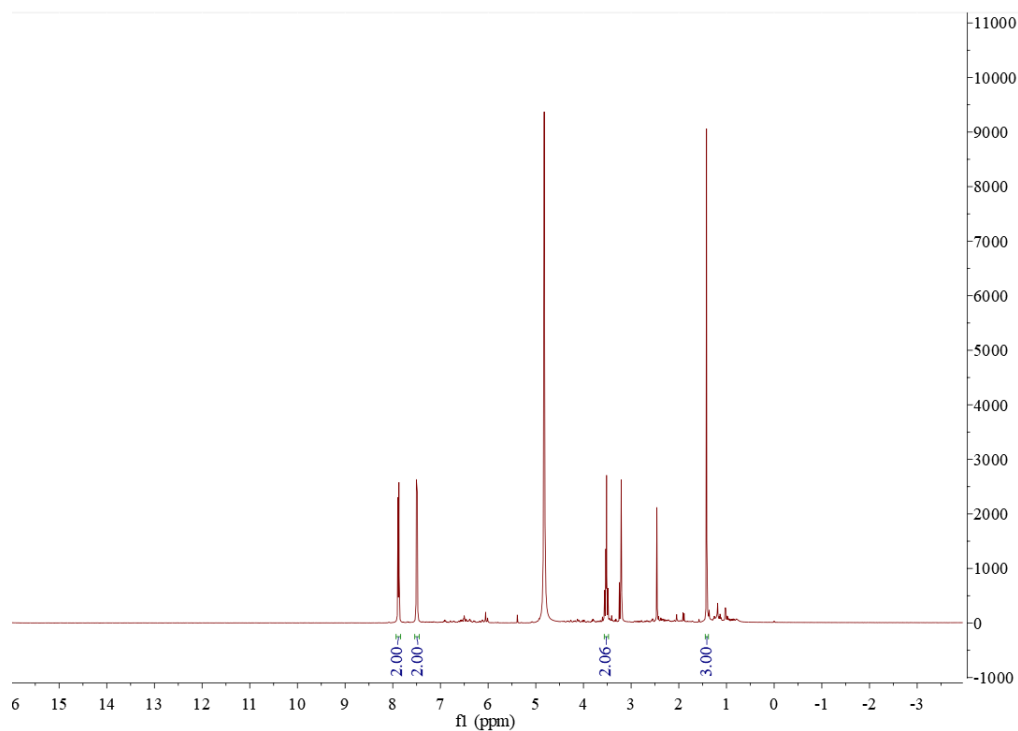

**Figure S18.** The <sup>1</sup>H NMR (400MHz) spectrum of compound **3** in CD<sub>3</sub>OD.

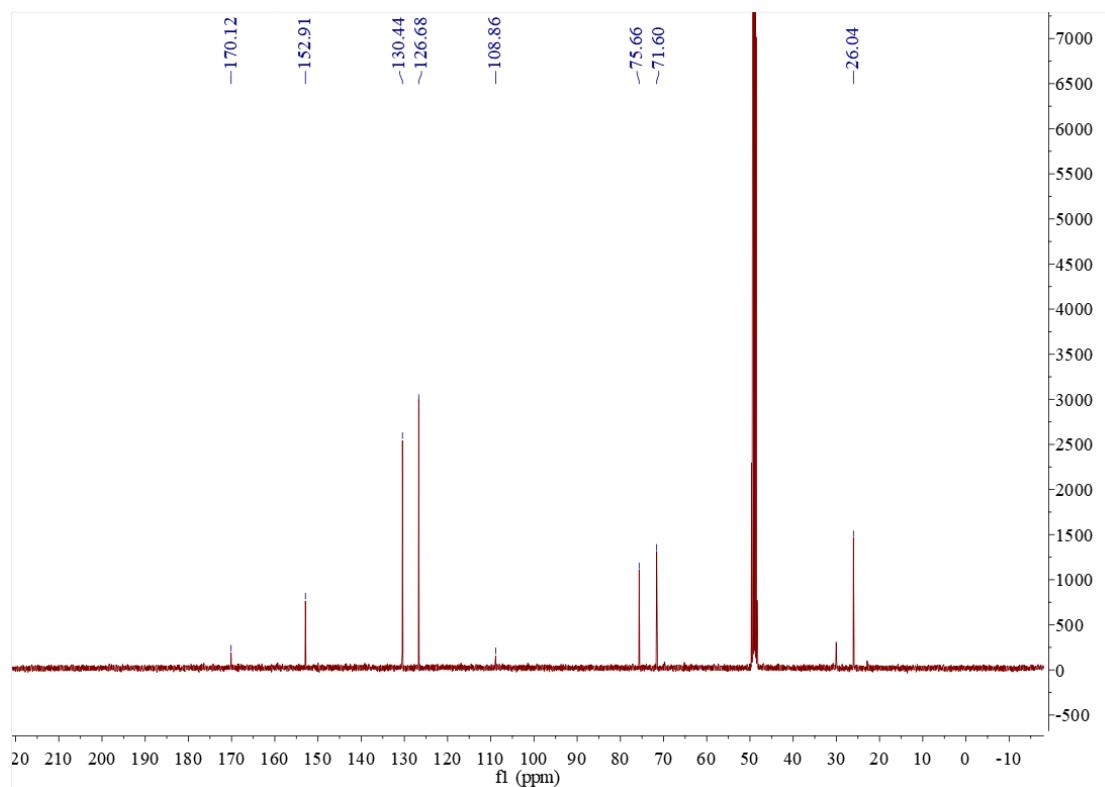

**Figure S19.** The <sup>13</sup>C NMR (100MHz) spectrum of compound **3** in CD<sub>3</sub>OD.

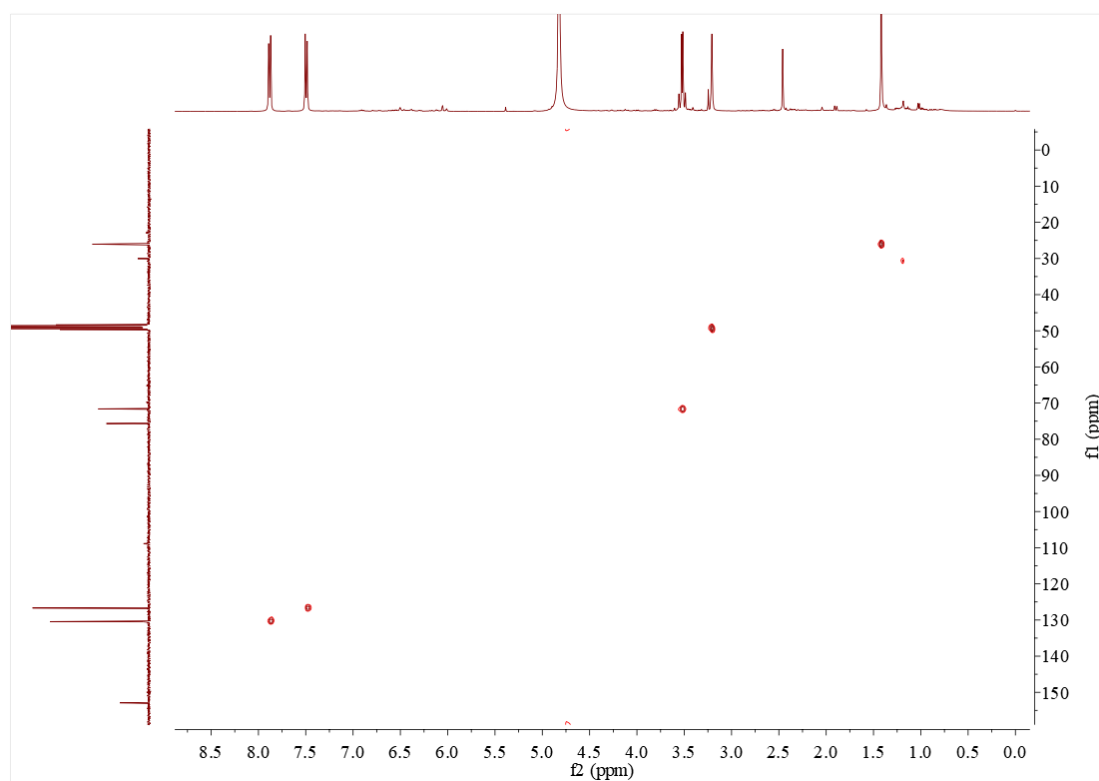

**Figure S20.** The HSQC spectrum of compound **3** in CD<sub>3</sub>OD.

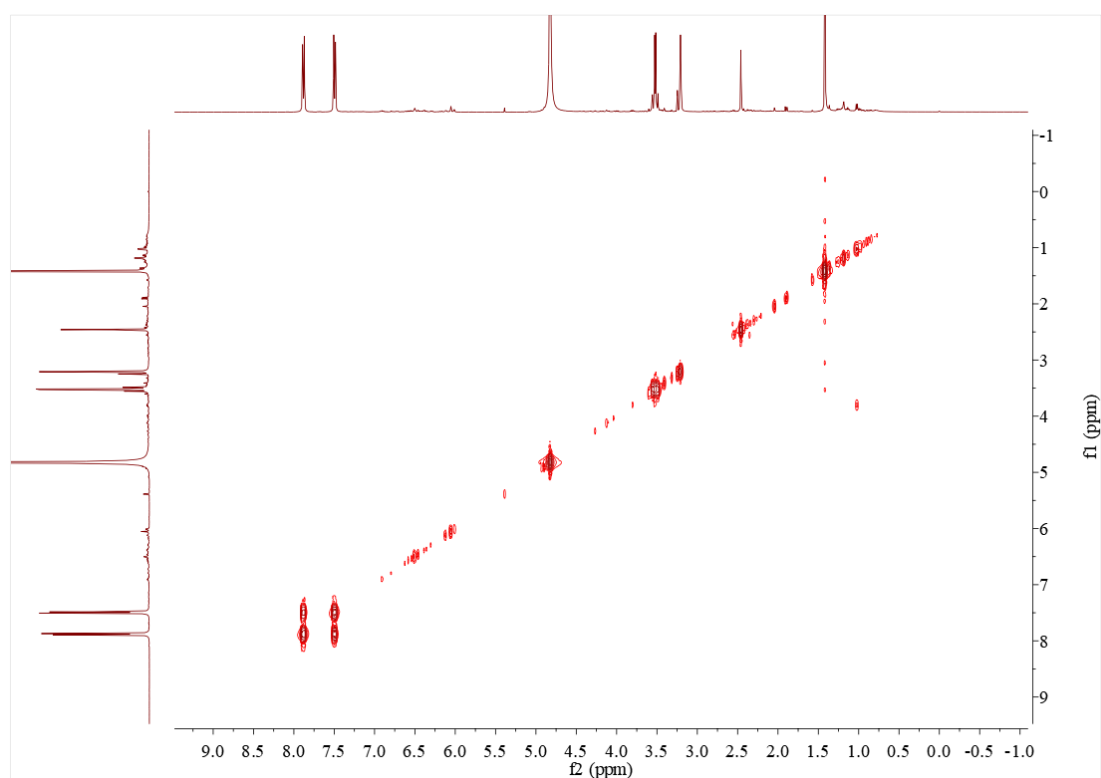

**Figure S21.** The  $^1\text{H}$ - $^1\text{H}$  COSY spectrum of compound **3** in  $\text{CD}_3\text{OD}$ .

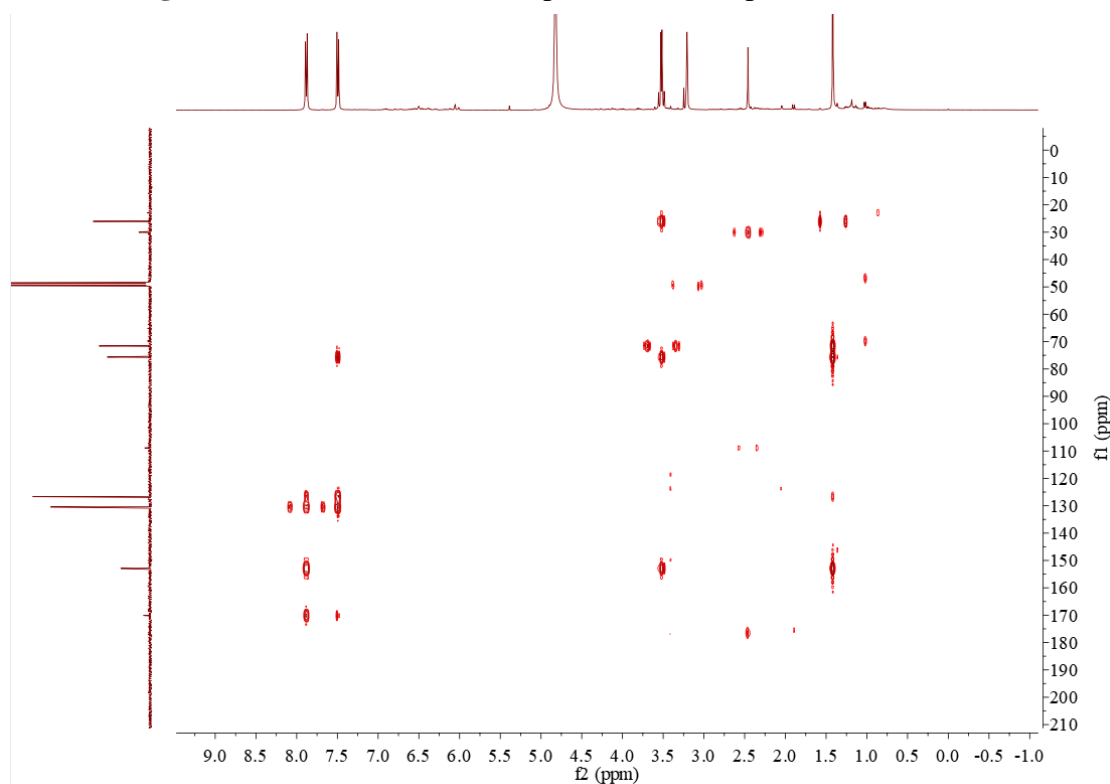

**Figure S22.** The HMBC spectrum of compound **3** in  $\text{CD}_3\text{OD}$ .

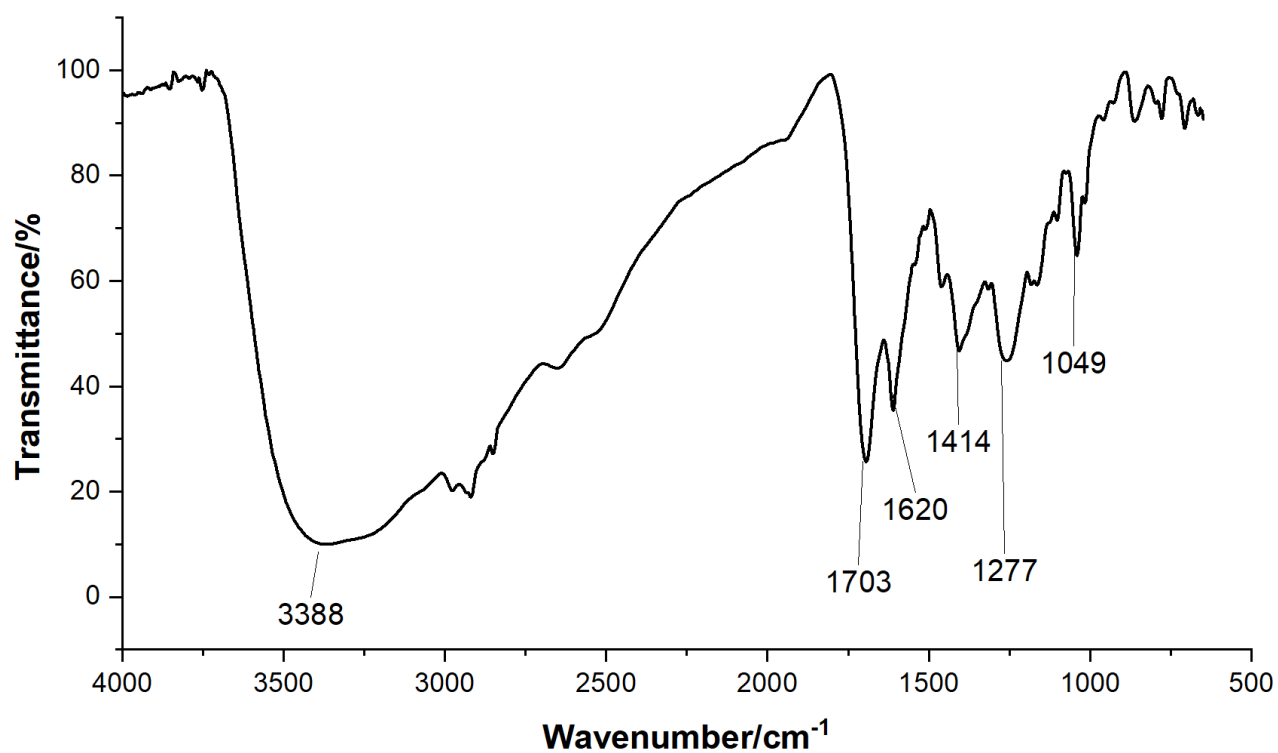

**Figure S23.** IR spectrum of compound **3**.

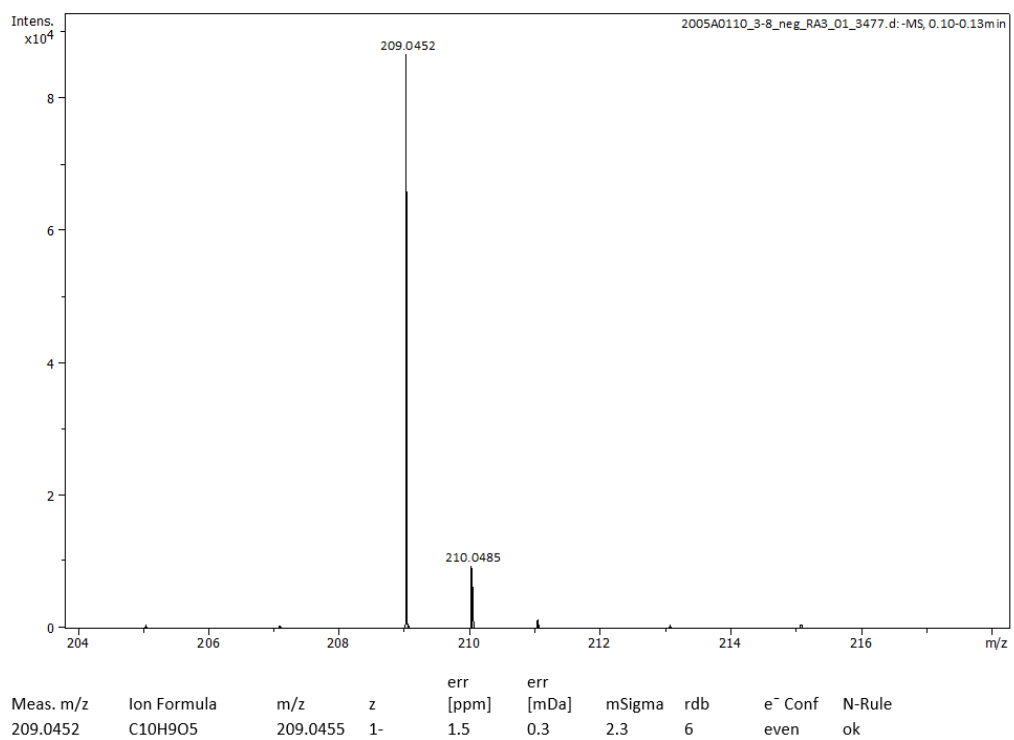

**Figure S24.** The HRESIMS spectrum of compound **6**.

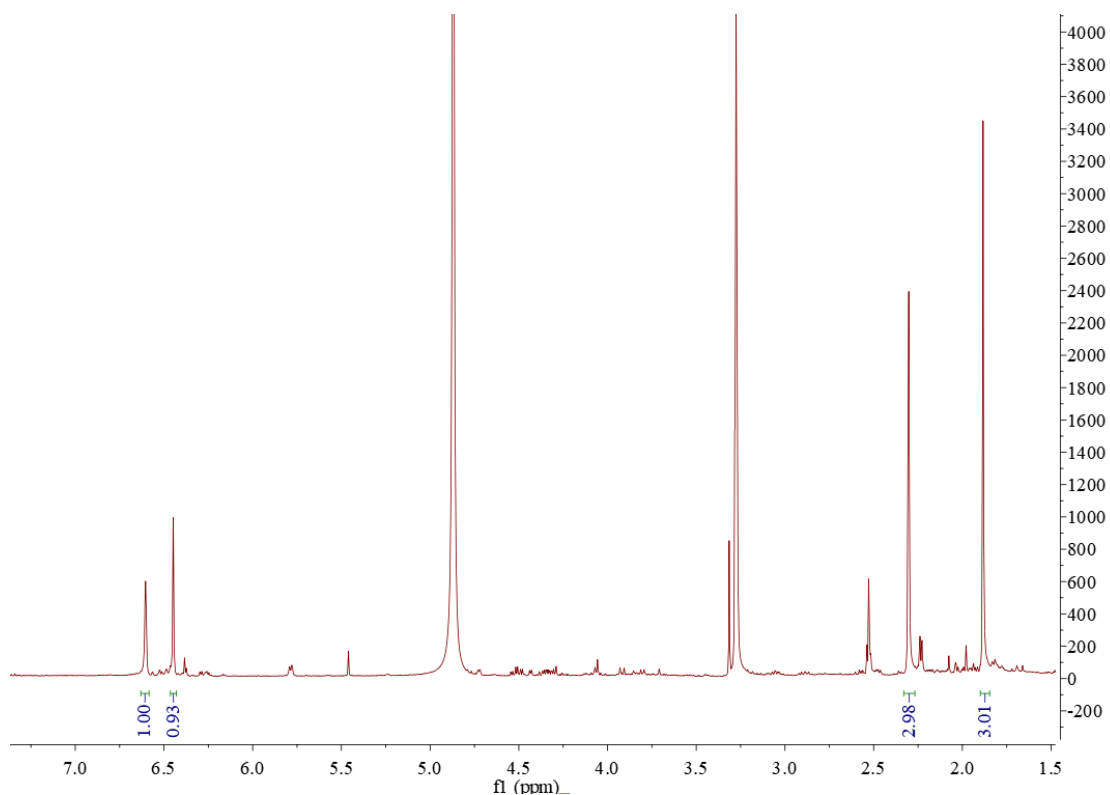

**Figure S25.** The <sup>1</sup>H NMR (400MHz) spectrum of compound **6** in CD<sub>3</sub>OD.

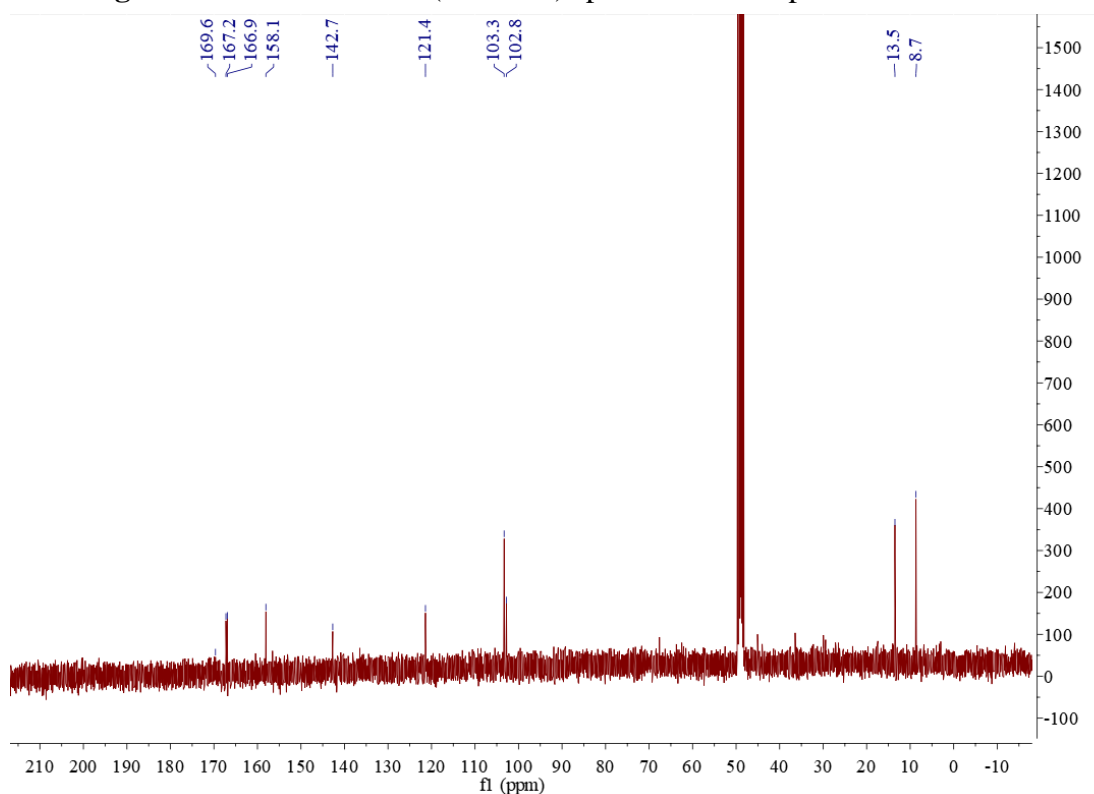

**Figure S26.** The <sup>13</sup>C NMR (100MHz) spectrum of compound **6** in CD<sub>3</sub>OD.

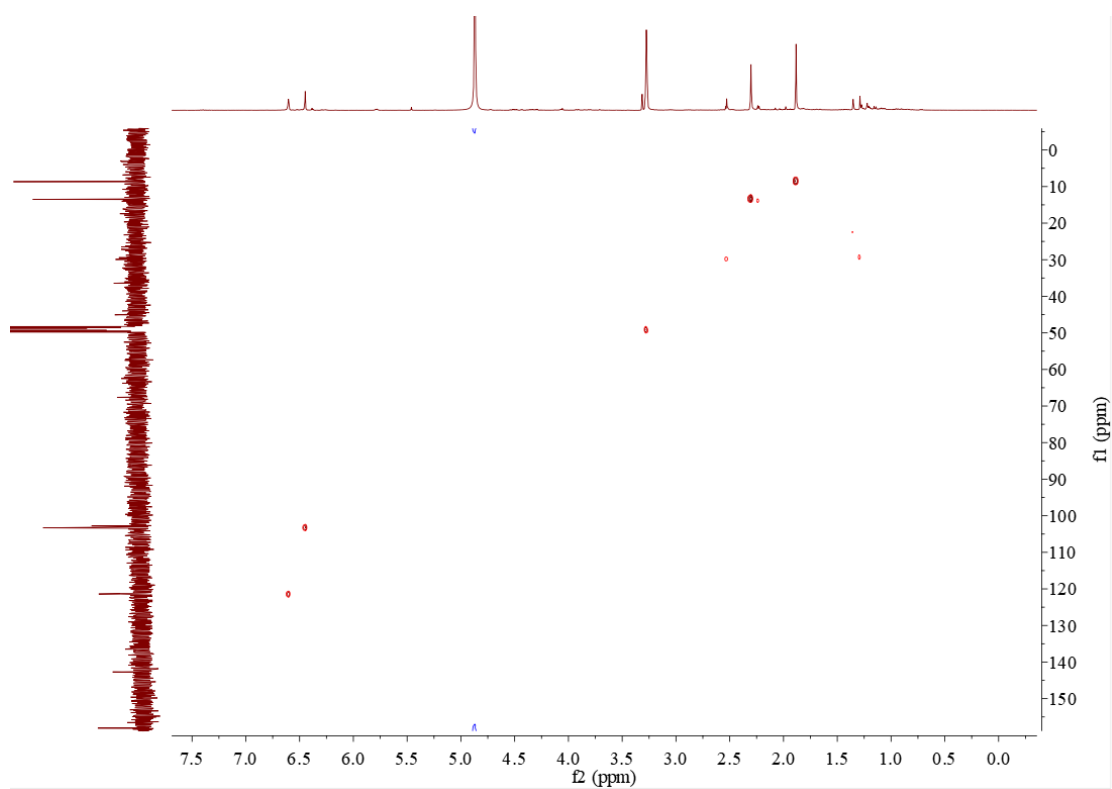

**Figure S27.** The HSQC spectrum of compound **6** in  $\text{CD}_3\text{OD}$ .

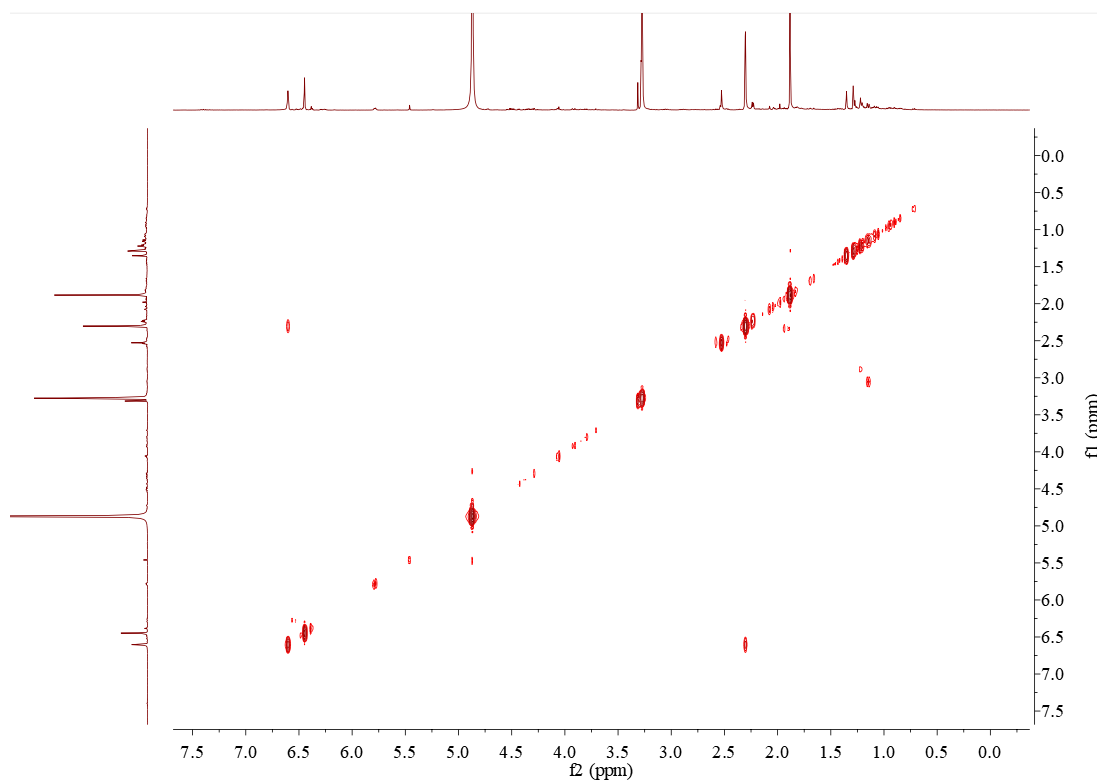

**Figure S28.** The  $^1\text{H}$ - $^1\text{H}$  COSY spectrum of compound **6** in  $\text{CD}_3\text{OD}$ .

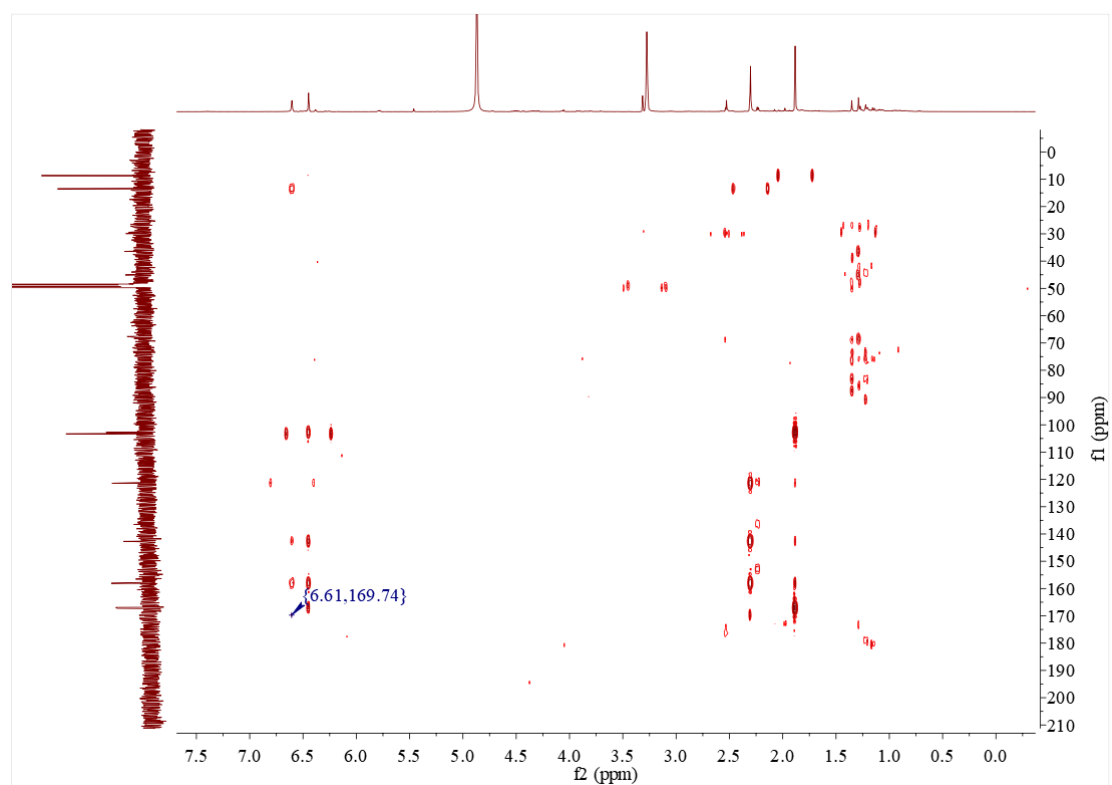

**Figure S29.** The HMBC spectrum of compound **6** in CD<sub>3</sub>OD.

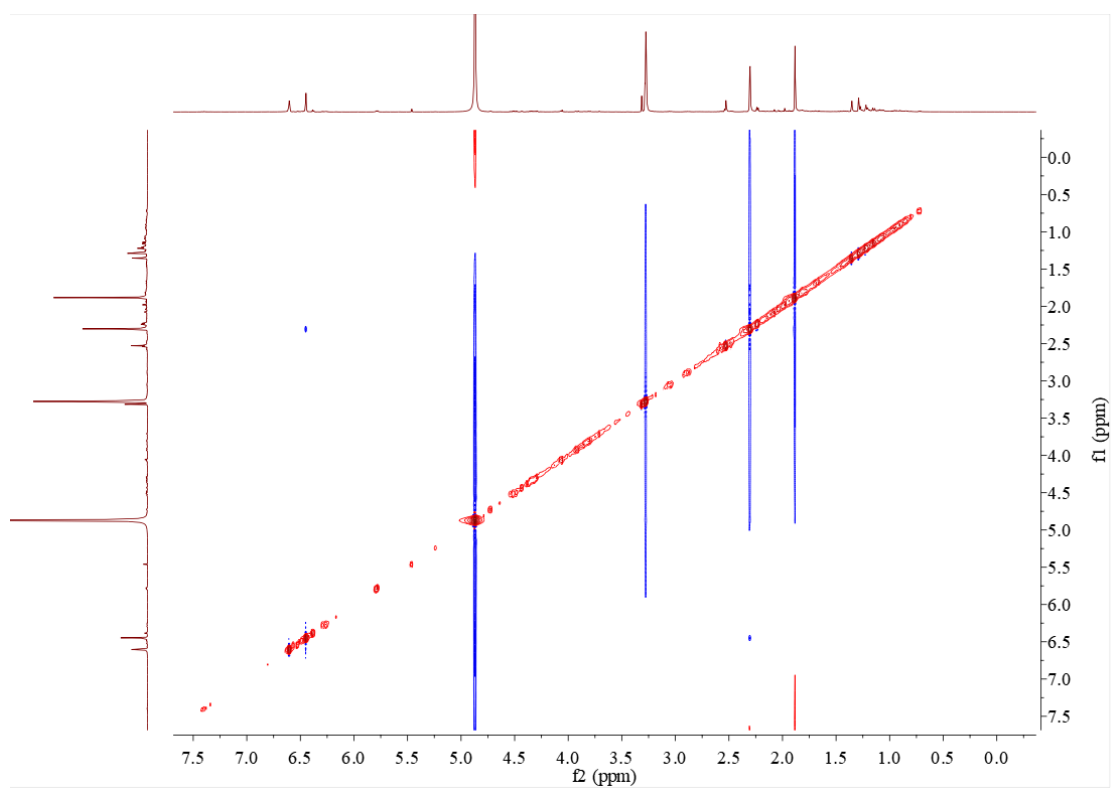

**Figure S30.** The NOESY spectrum of compound **6** in CD<sub>3</sub>OD.

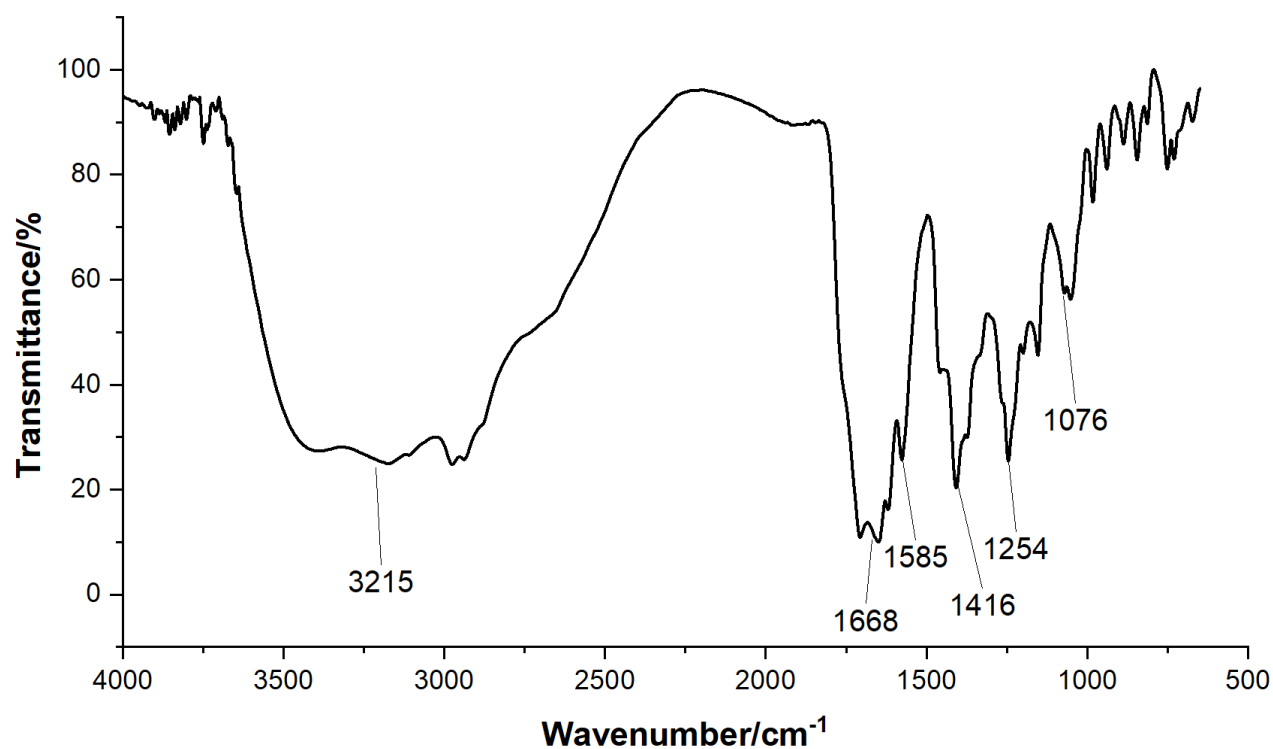

**Figure S31.** IR spectrum of compound **6**.

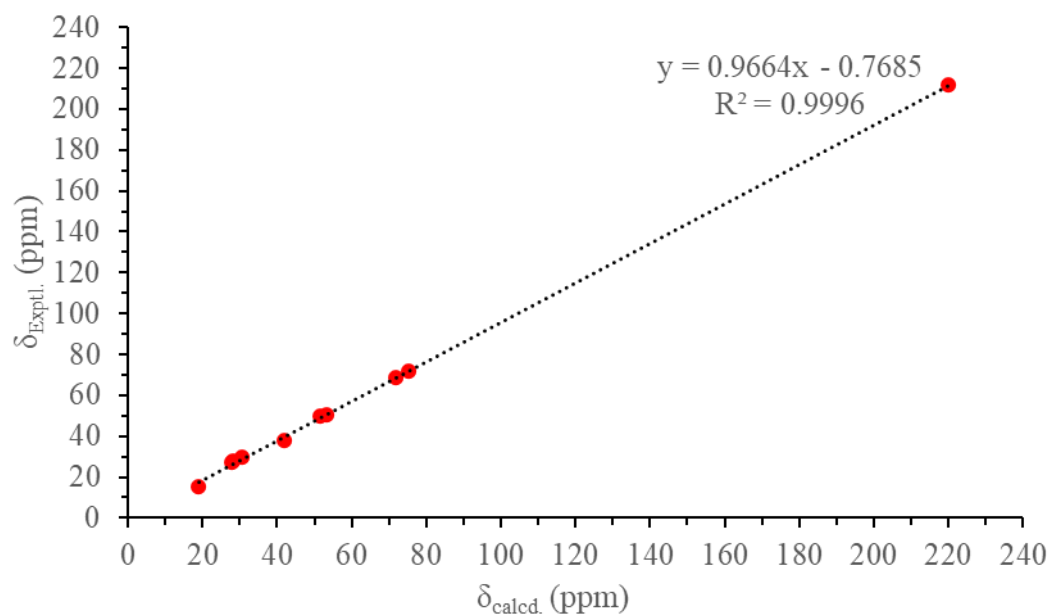

**Figure S32.** Linear correlation between the experimental  $^{13}\text{C}$  NMR chemical shifts for **2**.

| Functional                                                                    |      | Solvent?     |          | Basis Set    |          | Type of Data    |          |
|-------------------------------------------------------------------------------|------|--------------|----------|--------------|----------|-----------------|----------|
| mPW1PW91                                                                      |      | PCII         |          | 6-311+G(d,p) |          | Unscaled Shifts |          |
| 2 (3 <i>S</i> ,4 <i>R</i> ,6 <i>S</i> ) (3 <i>R</i> ,4 <i>R</i> ,6 <i>S</i> ) |      |              |          |              |          |                 |          |
|                                                                               |      | DP4+         | 100.00%  | 0.00%        | -        | -               | -        |
| Nuclei                                                                        | sp2? | experimental | Isomer 1 | Isomer 2     | Isomer 3 | Isomer 4        | Isomer 5 |
| C                                                                             | x    | 71.9         | 75.4     | 77.3         |          |                 |          |
| C                                                                             |      | 38.1         | 41.8     | 42.8         |          |                 |          |
| C                                                                             |      | 50.3         | 53.3     | 51.0         |          |                 |          |
| C                                                                             |      | 211.9        | 220.0    | 222.3        |          |                 |          |
| C                                                                             |      | 49.6         | 51.7     | 52.3         |          |                 |          |
| C                                                                             |      | 15.6         | 18.9     | 20.0         |          |                 |          |
| C                                                                             |      | 68.5         | 71.7     | 71.8         |          |                 |          |
| C                                                                             |      | 28           | 28.2     | 28.0         |          |                 |          |
| C                                                                             |      | 27.2         | 27.9     | 27.8         |          |                 |          |
| C                                                                             |      | 29.8         | 30.5     | 26.4         |          |                 |          |
| H                                                                             |      | 2.24         | 2.12     | 2.13         |          |                 |          |
| H                                                                             |      | 2.44         | 2.41     | 2.29         |          |                 |          |
| H                                                                             |      | 2.01         | 1.99     | 1.95         |          |                 |          |
| H                                                                             |      | 1.31         | 1.19     | 0.75         |          |                 |          |
| H                                                                             |      | 1.52         | 1.47     | 1.47         |          |                 |          |
| H                                                                             |      | 1.38         | 1.33     | 1.35         |          |                 |          |
| H                                                                             |      | 1.28         | 1.25     | 1.29         |          |                 |          |
| H                                                                             |      | 1.41         | 1.40     | 1.37         |          |                 |          |

| Functional       | Solvent?                                                                    |                              | Basis Set    |          | Type of Data    |          |
|------------------|-----------------------------------------------------------------------------|------------------------------|--------------|----------|-----------------|----------|
| mPW1PW91         | PCII                                                                        |                              | 6-311+G(d,p) |          | Unscaled Shifts |          |
|                  | (3 <i>S</i> ,4 <i>R</i> ,6 <i>S</i> ) (3 <i>R</i> ,4 <i>R</i> ,6 <i>S</i> ) |                              |              |          |                 |          |
|                  | Isomer 1                                                                    | Isomer 2                     | Isomer 3     | Isomer 4 | Isomer 5        | Isomer 6 |
| sDP4+ (H data)   | <div><div></div></div> 99.48%                                               | <div><div></div></div> 0.52% | –            | –        | –               | –        |
| sDP4+ (C data)   | <div><div></div></div> 99.90%                                               | <div><div></div></div> 0.10% | –            | –        | –               | –        |
| sDP4+ (all data) | <div><div></div></div> 100.00%                                              | <div><div></div></div> 0.00% | –            | –        | –               | –        |
| uDP4+ (H data)   | <div><div></div></div> 97.43%                                               | <div><div></div></div> 2.57% | –            | –        | –               | –        |
| uDP4+ (C data)   | <div><div></div></div> 99.85%                                               | <div><div></div></div> 0.15% | –            | –        | –               | –        |
| uDP4+ (all data) | <div><div></div></div> 100.00%                                              | <div><div></div></div> 0.00% | –            | –        | –               | –        |
| DP4+ (H data)    | <div><div></div></div> 99.99%                                               | <div><div></div></div> 0.01% | –            | –        | –               | –        |
| DP4+ (C data)    | <div><div></div></div> 100.00%                                              | <div><div></div></div> 0.00% | –            | –        | –               | –        |
| DP4+ (all data)  | <div><div></div></div> 100.00%                                              | <div><div></div></div> 0.00% | –            | –        | –               | –        |

Figure S33. The DP4 probability analysis

Table S1. Energy of all conformers of compound 2.

| compound | conformer | E <sub>tot</sub> (a.u.) | G <sub>298.15</sub> (a.u.) | P (%)  |
|----------|-----------|-------------------------|----------------------------|--------|
| 2        | 2-a       | -616.360310             | -616.155547                | 15.83% |
|          | 2-b       | -616.360558             | -616.154885                | 7.85%  |
|          | 2-c       | -616.360549             | -616.155133                | 10.21% |
|          | 2-d       | -616.360254             | -616.154269                | 4.09%  |
|          | 2-e       | -616.360769             | -616.154774                | 6.98%  |
|          | 2-f       | -616.360756             | -616.154634                | 6.01%  |
|          | 2-g       | -616.359980             | -616.154986                | 8.73%  |
|          | 2-h       | -616.361079             | -616.154589                | 5.73%  |
|          | 2-i       | -616.360969             | -616.154774                | 6.98%  |
|          | 2-j       | -616.361144             | -616.154300                | 4.22%  |

|            |             |             |       |
|------------|-------------|-------------|-------|
| <b>2-k</b> | -616.360508 | -616.154345 | 4.43% |
| <b>2-l</b> | -616.360631 | -616.154215 | 3.86% |
| <b>2-m</b> | -616.361432 | -616.154372 | 4.56% |
| <b>2-n</b> | -616.358216 | -616.152092 | 0.41% |
| <b>2-o</b> | -616.361160 | -616.154549 | 5.50% |
| <b>2-p</b> | -616.360881 | -616.153879 | 2.70% |
| <b>2-q</b> | -616.357909 | -616.151947 | 0.35% |
| <b>2-r</b> | -616.358380 | -616.152224 | 0.47% |
| <b>2-s</b> | -616.358406 | -616.151934 | 0.34% |
| <b>2-t</b> | -616.358148 | -616.151908 | 0.33% |
| <b>2-u</b> | -616.358650 | -616.152150 | 0.43% |

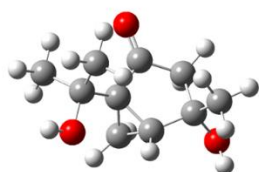

**2-a**

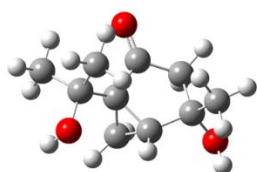

**2-b**

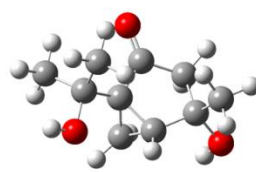

**2-c**

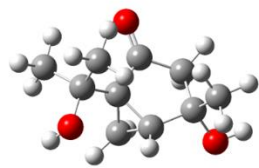

**2-d**

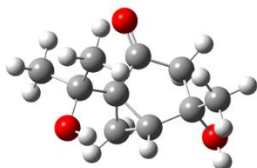

**2-e**

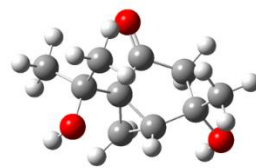

**2-f**

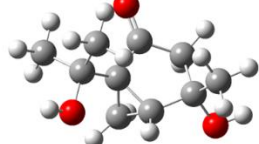

**2-g**

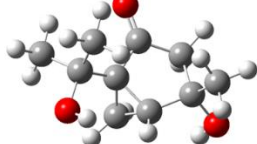

**2-h**

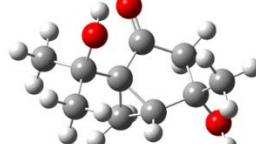

**2-i**

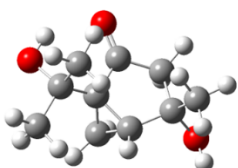

**2-j**

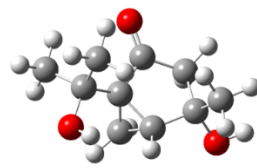

**2-k**

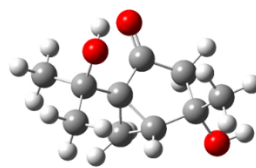

**2-l**

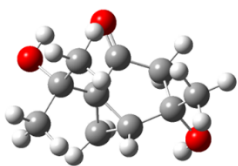

**2-m**

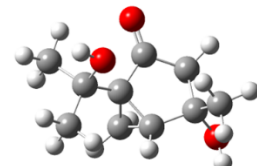

**2-n**

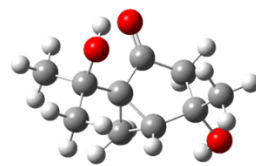

**2-o**

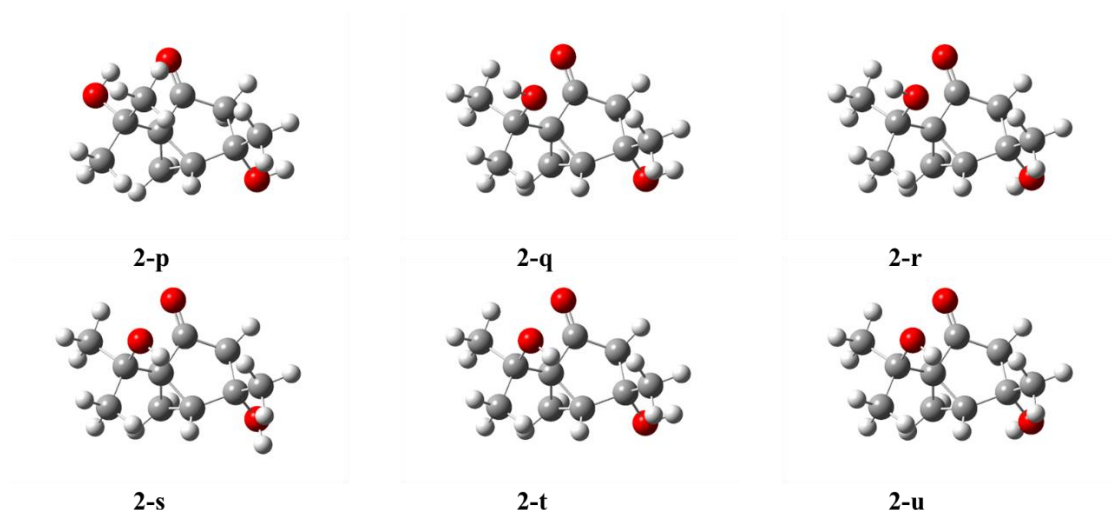

**Figure S34.** wB97XD/TZVP optimized low-energy conformers of compound **2**.

**Table S2.** Cartesian coordinates of the low-energy reoptimized conformers of **2** calculated at PBE1PBE/TZVP level of theory in IEFPCM for methanol.

| <b>2-a</b> |            |            |            |
|------------|------------|------------|------------|
| Atom       | X axis (Å) | Y axis (Å) | Z axis (Å) |
| C          | 1.983325   | -0.202841  | 0.129111   |
| C          | 0.712761   | -0.993501  | -0.170863  |
| C          | -0.448581  | -0.036523  | -0.35212   |
| C          | 0.142548   | 1.332078   | -0.274881  |
| C          | 1.656571   | 1.221294   | -0.333658  |
| C          | 0.113002   | -0.832763  | -1.5199    |
| C          | -1.853893  | -0.309656  | 0.165435   |
| C          | -2.894901  | 0.375767   | -0.715882  |
| C          | -1.978774  | 0.129374   | 1.623071   |
| O          | -2.020288  | -1.729915  | 0.086743   |
| O          | -0.463091  | 2.371691   | -0.143474  |
| O          | 3.105423   | -0.66383   | -0.617215  |
| C          | 2.28015    | -0.24754   | 1.623856   |
| H          | 0.546283   | -1.92092   | 0.361243   |
| H          | 1.984282   | 1.37116    | -1.365169  |
| H          | 2.118566   | 1.995343   | 0.277105   |
| H          | 0.665674   | -0.315048  | -2.293312  |
| H          | -0.531873  | -1.628133  | -1.865187  |
| H          | -2.80255   | 0.023371   | -1.744412  |
| H          | -3.901557  | 0.146876   | -0.356848  |
| H          | -2.759585  | 1.456703   | -0.698114  |
| H          | -1.232483  | -0.383083  | 2.232716   |
| H          | -2.970943  | -0.121927  | 2.005715   |

|   |           |           |           |
|---|-----------|-----------|-----------|
| H | -1.840701 | 1.205779  | 1.722607  |
| H | -2.907687 | -1.937471 | 0.388714  |
| H | 3.324807  | -1.548886 | -0.314394 |
| H | 3.167724  | 0.344703  | 1.850814  |
| H | 2.451146  | -1.276623 | 1.949244  |
| H | 1.43931   | 0.150469  | 2.195838  |

| 2-b  |            |            |            |
|------|------------|------------|------------|
| Atom | X axis (Å) | Y axis (Å) | Z axis (Å) |
| C    | 1.979176   | -0.203392  | 0.128202   |
| C    | 0.708069   | -0.991311  | -0.174359  |
| C    | -0.452246  | -0.036626  | -0.362576  |
| C    | 0.144888   | 1.332624   | -0.293945  |
| C    | 1.658876   | 1.217985   | -0.346914  |
| C    | 0.111693   | -0.836619  | -1.525714  |
| C    | -1.856133  | -0.311139  | 0.181916   |
| C    | -2.908823  | 0.421626   | -0.642408  |
| C    | -1.923106  | 0.078416   | 1.652883   |
| O    | -2.11204   | -1.718177  | 0.148547   |
| O    | -0.457958  | 2.374283   | -0.168012  |
| O    | 3.105026   | -0.673308  | -0.606285  |
| C    | 2.263662   | -0.237395  | 1.62566    |
| H    | 0.53638    | -1.91781   | 0.358464   |
| H    | 1.990065   | 1.358308   | -1.37872   |
| H    | 2.121565   | 1.995676   | 0.258672   |
| H    | 0.662928   | -0.321637  | -2.301769  |
| H    | -0.510244  | -1.646924  | -1.880605  |
| H    | -2.858128  | 0.110576   | -1.689563  |
| H    | -3.904578  | 0.196848   | -0.256068  |
| H    | -2.744234  | 1.497286   | -0.59934   |
| H    | -1.191072  | -0.494301  | 2.225244   |
| H    | -2.917267  | -0.134505  | 2.047917   |
| H    | -1.717612  | 1.140637   | 1.781581   |
| H    | -2.425614  | -1.954371  | -0.727528  |
| H    | 3.322357   | -1.554901  | -0.291999  |
| H    | 3.151789   | 0.353065   | 1.854996   |
| H    | 2.427437   | -1.26436   | 1.961182   |
| H    | 1.419675   | 0.169017   | 2.187062   |

| 2-c  |            |            |            |
|------|------------|------------|------------|
| Atom | X axis (Å) | Y axis (Å) | Z axis (Å) |
| C    | 1.983214   | -0.208751  | 0.146588   |
| C    | 0.712637   | -0.999767  | -0.138531  |
| C    | -0.443792  | -0.046502  | -0.352577  |

|   |           |           |           |
|---|-----------|-----------|-----------|
| C | 0.152292  | 1.32301   | -0.315864 |
| C | 1.6656    | 1.203588  | -0.38437  |
| C | 0.114481  | -0.876579 | -1.49724  |
| C | -1.849765 | -0.301026 | 0.172676  |
| C | -2.889122 | 0.363289  | -0.726411 |
| C | -1.971871 | 0.177086  | 1.618027  |
| O | -2.019725 | -1.722297 | 0.131381  |
| O | -0.451077 | 2.365411  | -0.198993 |
| O | 3.130587  | -0.789251 | -0.459731 |
| C | 2.258424  | -0.176723 | 1.64081   |
| H | 0.544469  | -1.915581 | 0.41159   |
| H | 1.98261   | 1.314755  | -1.424943 |
| H | 2.13897   | 2.000106  | 0.18753   |
| H | 0.650518  | -0.375263 | -2.29384  |
| H | -0.527844 | -1.684397 | -1.81687  |
| H | -2.801853 | -0.021441 | -1.743719 |
| H | -3.895744 | 0.150975  | -0.35731  |
| H | -2.74816  | 1.443525  | -0.742399 |
| H | -1.226679 | -0.321262 | 2.240576  |
| H | -2.964383 | -0.061332 | 2.007746  |
| H | -1.830327 | 1.25541   | 1.688447  |
| H | -2.909662 | -1.919579 | 0.432736  |
| H | 2.93887   | -0.939862 | -1.389292 |
| H | 3.163242  | 0.397466  | 1.845112  |
| H | 2.389447  | -1.18969  | 2.024106  |
| H | 1.425654  | 0.2895    | 2.170636  |

| 2-d  |            |            |            |
|------|------------|------------|------------|
| Atom | X axis (Å) | Y axis (Å) | Z axis (Å) |
| C    | 1.972476   | -0.21882   | 0.129147   |
| C    | 0.70393    | -0.99842   | -0.170048  |
| C    | -0.451434  | -0.039802  | -0.366893  |
| C    | 0.151013   | 1.327917   | -0.314582  |
| C    | 1.664174   | 1.203081   | -0.377896  |
| C    | 0.106179   | -0.854519  | -1.522835  |
| C    | -1.854116  | -0.303528  | 0.185774   |
| C    | -2.906922  | 0.428907   | -0.638658  |
| C    | -1.91247   | 0.095649   | 1.654563   |
| O    | -2.117458  | -1.709434  | 0.162789   |
| O    | -0.446787  | 2.3724     | -0.188382  |
| O    | 3.049671   | -0.833498  | -0.568857  |
| C    | 2.23958    | -0.213588  | 1.63038    |
| H    | 0.529932   | -1.919832  | 0.369539   |
| H    | 1.98711    | 1.317974   | -1.415488  |

|   |           |           |           |
|---|-----------|-----------|-----------|
| H | 2.135963  | 1.991193  | 0.207708  |
| H | 0.654462  | -0.349813 | -2.30714  |
| H | -0.519371 | -1.667191 | -1.865508 |
| H | -2.862598 | 0.110351  | -1.683856 |
| H | -3.901883 | 0.211502  | -0.246153 |
| H | -2.737228 | 1.504037  | -0.603776 |
| H | -1.181979 | -0.478528 | 2.227413  |
| H | -2.906319 | -0.108332 | 2.055054  |
| H | -1.699478 | 1.157263  | 1.776102  |
| H | -2.438037 | -1.949395 | -0.709715 |
| H | 3.863327  | -0.386246 | -0.322265 |
| H | 3.14346   | 0.356881  | 1.856766  |
| H | 2.367399  | -1.233563 | 1.995926  |
| H | 1.407369  | 0.246695  | 2.167289  |

| 2-e  |            |            |            |
|------|------------|------------|------------|
| Atom | X axis (Å) | Y axis (Å) | Z axis (Å) |
| C    | 1.986141   | -0.200658  | 0.122012   |
| C    | 0.716053   | -0.986275  | -0.194237  |
| C    | -0.450637  | -0.028588  | -0.346787  |
| C    | 0.140228   | 1.339728   | -0.243919  |
| C    | 1.654304   | 1.234639   | -0.299765  |
| C    | 0.106389   | -0.795519  | -1.534269  |
| C    | -1.866171  | -0.317553  | 0.159092   |
| C    | -2.895468  | 0.343692   | -0.745697  |
| C    | -2.014791  | 0.136655   | 1.608251   |
| O    | -2.12459   | -1.721916  | 0.072981   |
| O    | -0.469208  | 2.375581   | -0.101831  |
| O    | 3.104942   | -0.637682  | -0.642664  |
| C    | 2.289727   | -0.288704  | 1.613445   |
| H    | 0.574372   | -1.93518   | 0.308467   |
| H    | 1.983711   | 1.414613   | -1.325918  |
| H    | 2.112721   | 1.992239   | 0.333957   |
| H    | 0.653924   | -0.262764  | -2.301091  |
| H    | -0.539972  | -1.586132  | -1.889622  |
| H    | -2.808012  | -0.050834  | -1.759365  |
| H    | -3.901401  | 0.139428   | -0.375521  |
| H    | -2.73778   | 1.421064   | -0.773201  |
| H    | -1.273827  | -0.359047  | 2.241851   |
| H    | -3.011008  | -0.116445  | 1.97412    |
| H    | -1.873647  | 1.213271   | 1.696151   |
| H    | -1.6916    | -2.158389  | 0.810834   |
| H    | 3.335839   | -1.526034  | -0.358778  |
| H    | 3.176197   | 0.299758   | 1.853876   |

|   |          |           |          |
|---|----------|-----------|----------|
| H | 2.466437 | -1.326609 | 1.906438 |
| H | 1.450251 | 0.088691  | 2.201156 |

| 2-f  |            |            |            |
|------|------------|------------|------------|
| Atom | X axis (Å) | Y axis (Å) | Z axis (Å) |
| C    | 1.978987   | -0.209928  | 0.145619   |
| C    | 0.707698   | -0.997141  | -0.144484  |
| C    | -0.447525  | -0.045525  | -0.362931  |
| C    | 0.154993   | 1.324274   | -0.331611  |
| C    | 1.668319   | 1.200812   | -0.392961  |
| C    | 0.11314    | -0.876338  | -1.505059  |
| C    | -1.852316  | -0.30241   | 0.188181   |
| C    | -2.902565  | 0.417954   | -0.649768  |
| C    | -1.915085  | 0.116146   | 1.65136    |
| O    | -2.113419  | -1.708834  | 0.182313   |
| O    | -0.445031  | 2.368876   | -0.219736  |
| O    | 3.129067   | -0.795857  | -0.449783  |
| C    | 2.242509   | -0.172507  | 1.641828   |
| H    | 0.534045   | -1.913379  | 0.404037   |
| H    | 1.989725   | 1.305996   | -1.432862  |
| H    | 2.141832   | 1.998756   | 0.176831   |
| H    | 0.648575   | -0.376351  | -2.302646  |
| H    | -0.506529  | -1.698266  | -1.835551  |
| H    | -2.854873  | 0.084298   | -1.690115  |
| H    | -3.898615  | 0.205773   | -0.257186  |
| H    | -2.733321  | 1.493508   | -0.62988   |
| H    | -1.18597   | -0.450145  | 2.233752   |
| H    | -2.909984  | -0.083482  | 2.051387   |
| H    | -1.703094  | 1.179391   | 1.759915   |
| H    | -2.442437  | -1.958503  | -0.684292  |
| H    | 2.945255   | -0.94719   | -1.380812  |
| H    | 3.146827   | 0.400744   | 1.850844   |
| H    | 2.368397   | -1.184126  | 2.03036    |
| H    | 1.406301   | 0.297473   | 2.162825   |

| 2-g  |            |            |            |
|------|------------|------------|------------|
| Atom | X axis (Å) | Y axis (Å) | Z axis (Å) |
| C    | 1.975205   | -0.218658  | 0.129613   |
| C    | 0.708127   | -1.000658  | -0.171654  |
| C    | -0.44785   | -0.039032  | -0.36043   |
| C    | 0.149033   | 1.327827   | -0.295784  |
| C    | 1.662099   | 1.206329   | -0.36592   |
| C    | 0.107623   | -0.848086  | -1.522237  |
| C    | -1.850767  | -0.302652  | 0.168015   |

|   |           |           |           |
|---|-----------|-----------|-----------|
| C | -2.894676 | 0.393913  | -0.700983 |
| C | -1.957576 | 0.132729  | 1.628241  |
| O | -2.029634 | -1.721105 | 0.086563  |
| O | -0.451131 | 2.369975  | -0.159635 |
| O | 3.052447  | -0.825003 | -0.57587  |
| C | 2.247118  | -0.223689 | 1.630018  |
| H | 0.538191  | -1.92382  | 0.365518  |
| H | 1.981338  | 1.329912  | -1.403603 |
| H | 2.134156  | 1.990742  | 0.224407  |
| H | 0.657496  | -0.339172 | -2.302921 |
| H | -0.540567 | -1.645117 | -1.857093 |
| H | -2.813588 | 0.045786  | -1.731937 |
| H | -3.899492 | 0.169549  | -0.334115 |
| H | -2.752038 | 1.473793  | -0.679245 |
| H | -1.210044 | -0.388416 | 2.228938  |
| H | -2.948207 | -0.110593 | 2.019922  |
| H | -1.808881 | 1.207594  | 1.729763  |
| H | -2.911511 | -1.923447 | 0.407656  |
| H | 3.865417  | -0.377486 | -0.327507 |
| H | 3.149111  | 0.3491    | 1.858221  |
| H | 2.380653  | -1.245962 | 1.987024  |
| H | 1.414495  | 0.228467  | 2.17325   |

| 2-h  |            |            |            |
|------|------------|------------|------------|
| Atom | X axis (Å) | Y axis (Å) | Z axis (Å) |
| C    | 1.986594   | -0.208047  | 0.138351   |
| C    | 0.71583    | -0.991864  | -0.166159  |
| C    | -0.4459    | -0.036014  | -0.346239  |
| C    | 0.150137   | 1.333792   | -0.277753  |
| C    | 1.663815   | 1.220321   | -0.342799  |
| C    | 0.108087   | -0.830894  | -1.515911  |
| C    | -1.862701  | -0.310024  | 0.165062   |
| C    | -2.889281  | 0.336039   | -0.753623  |
| C    | -2.010429  | 0.172978   | 1.604735   |
| O    | -2.124636  | -1.715084  | 0.106578   |
| O    | -0.456496  | 2.372669   | -0.148795  |
| O    | 3.130445   | -0.766895  | -0.493788  |
| C    | 2.271068   | -0.228048  | 1.631087   |
| H    | 0.572483   | -1.932549  | 0.350003   |
| H    | 1.983295   | 1.369296   | -1.377845  |
| H    | 2.13305    | 1.997781   | 0.2581     |
| H    | 0.639045   | -0.309757  | -2.303198  |
| H    | -0.535326  | -1.632469  | -1.850799  |
| H    | -2.803045  | -0.079755  | -1.758847  |

|   |           |           |           |
|---|-----------|-----------|-----------|
| H | -3.895832 | 0.142556  | -0.379492 |
| H | -2.728237 | 1.412114  | -0.803397 |
| H | -1.269594 | -0.31043  | 2.247843  |
| H | -3.006638 | -0.072935 | 1.975441  |
| H | -1.869541 | 1.251023  | 1.672248  |
| H | -1.700219 | -2.137489 | 0.857537  |
| H | 2.938229  | -0.876488 | -1.429009 |
| H | 3.175298  | 0.341723  | 1.849588  |
| H | 2.408688  | -1.253662 | 1.976622  |
| H | 1.440523  | 0.216086  | 2.18274   |

| 2-i  |            |            |            |
|------|------------|------------|------------|
| Atom | X axis (Å) | Y axis (Å) | Z axis (Å) |
| C    | 2.001687   | -0.199929  | 0.118461   |
| C    | 0.736636   | -1.015766  | -0.142673  |
| C    | -0.443949  | -0.074765  | -0.332196  |
| C    | 0.143731   | 1.293916   | -0.275609  |
| C    | 1.651583   | 1.204573   | -0.389096  |
| C    | 0.116201   | -0.894898  | -1.483315  |
| C    | -1.86961   | -0.281043  | 0.184637   |
| C    | -2.145321  | -1.730799  | 0.553353   |
| C    | -2.872929  | 0.208006   | -0.861973  |
| O    | -2.038122  | 0.453981   | 1.400669   |
| O    | -0.478144  | 2.317816   | -0.080578  |
| O    | 3.119605   | -0.673011  | -0.622963  |
| C    | 2.309659   | -0.188011  | 1.611304   |
| H    | 0.606055   | -1.936201  | 0.411542   |
| H    | 1.940223   | 1.312823   | -1.437448  |
| H    | 2.129288   | 2.004662   | 0.173505   |
| H    | 0.647689   | -0.391237  | -2.280274  |
| H    | -0.511957  | -1.711079  | -1.814034  |
| H    | -1.492838  | -2.050608  | 1.366242   |
| H    | -3.179738  | -1.824378  | 0.885759   |
| H    | -2.003397  | -2.398513  | -0.296818  |
| H    | -2.69785   | 1.257921   | -1.101332  |
| H    | -3.88765   | 0.10086    | -0.475214  |
| H    | -2.786964  | -0.372902  | -1.781596  |
| H    | -1.883951  | 1.382115   | 1.190277   |
| H    | 3.374476   | -1.530127  | -0.271291  |
| H    | 3.18946    | 0.425032   | 1.810765   |
| H    | 2.498345   | -1.202404  | 1.970916   |
| H    | 1.465969   | 0.216047   | 2.174624   |

| 2-j |  |  |  |
|-----|--|--|--|
|-----|--|--|--|

| Atom | X axis (Å) | Y axis (Å) | Z axis (Å) |
|------|------------|------------|------------|
| C    | 1.974581   | -0.211452  | 0.150054   |
| C    | 0.717821   | -1.015389  | -0.182196  |
| C    | -0.448588  | -0.072233  | -0.387734  |
| C    | 0.135511   | 1.299045   | -0.318946  |
| C    | 1.646903   | 1.211923   | -0.320013  |
| C    | 0.145278   | -0.865176  | -1.543488  |
| C    | -1.863405  | -0.274622  | 0.153563   |
| C    | -1.866772  | -0.003581  | 1.661392   |
| C    | -2.409567  | -1.666521  | -0.123079  |
| O    | -2.747422  | 0.632625   | -0.510537  |
| O    | -0.503375  | 2.328017   | -0.233772  |
| O    | 3.116893   | -0.659711  | -0.569566  |
| C    | 2.231966   | -0.255823  | 1.651937   |
| H    | 0.561583   | -1.947594  | 0.347173   |
| H    | 2.011685   | 1.371289   | -1.337626  |
| H    | 2.075743   | 1.98884    | 0.310982   |
| H    | 0.708709   | -0.340547  | -2.304407  |
| H    | -0.464418  | -1.675589  | -1.916227  |
| H    | -1.515559  | 1.006157   | 1.880432   |
| H    | -2.879991  | -0.10631   | 2.052221   |
| H    | -1.220201  | -0.713525  | 2.180936   |
| H    | -2.531827  | -1.831576  | -1.193438  |
| H    | -3.386844  | -1.768044  | 0.350126   |
| H    | -1.754686  | -2.438502  | 0.283408   |
| H    | -2.352169  | 1.510499   | -0.428208  |
| H    | 3.353009   | -1.533911  | -0.248313  |
| H    | 3.106745   | 0.345473   | 1.902931   |
| H    | 2.405051   | -1.283546  | 1.980327   |
| H    | 1.372019   | 0.132408   | 2.201741   |

| 2-k  |            |            |            |
|------|------------|------------|------------|
| Atom | X axis (Å) | Y axis (Å) | Z axis (Å) |
| C    | 1.978983   | -0.216176  | 0.122276   |
| C    | 0.711696   | -0.993053  | -0.191485  |
| C    | -0.449794  | -0.030917  | -0.352311  |
| C    | 0.146629   | 1.33609    | -0.264745  |
| C    | 1.660034   | 1.220583   | -0.332604  |
| C    | 0.101233   | -0.811999  | -1.533432  |
| C    | -1.86387   | -0.310399  | 0.162809   |
| C    | -2.895074  | 0.353889   | -0.737476  |
| C    | -2.000806  | 0.148834   | 1.611555   |
| O    | -2.130978  | -1.713419  | 0.082697   |
| O    | -0.457443  | 2.374739   | -0.120676  |

| O     | 3.050894   | -0.802228  | -0.607692  |
|-------|------------|------------|------------|
| C     | 2.262927   | -0.263022  | 1.619722   |
| H     | 0.567404   | -1.937484  | 0.31758    |
| H     | 1.980281   | 1.374536   | -1.365928  |
| H     | 2.128491   | 1.989569   | 0.280516   |
| H     | 0.646093   | -0.288659  | -2.308086  |
| H     | -0.548454  | -1.604572  | -1.87789   |
| H     | -2.815416  | -0.043391  | -1.750725  |
| H     | -3.899672  | 0.1551     | -0.360802  |
| H     | -2.73259   | 1.430439   | -0.768306  |
| H     | -1.25918   | -0.349884  | 2.241984   |
| H     | -2.99629   | -0.097025  | 1.984303   |
| H     | -1.852617  | 1.22482    | 1.695824   |
| H     | -1.697679  | -2.150276  | 0.820151   |
| H     | 3.865549   | -0.360829  | -0.353819  |
| H     | 3.165066   | 0.306067   | 1.856181   |
| H     | 2.403426   | -1.294799  | 1.945355   |
| H     | 1.43404    | 0.170666   | 2.183165   |
| <hr/> |            |            |            |
| <hr/> |            |            |            |
| 2-I   |            |            |            |
| <hr/> |            |            |            |
| Atom  | X axis (Å) | Y axis (Å) | Z axis (Å) |
| C     | 1.995102   | -0.21486   | 0.12029    |
| C     | 0.732858   | -1.022076  | -0.137755  |
| C     | -0.443022  | -0.077728  | -0.336907  |
| C     | 0.14952    | 1.289607   | -0.296159  |
| C     | 1.656324   | 1.19041    | -0.418196  |
| C     | 0.11148    | -0.912629  | -1.479958  |
| C     | -1.867177  | -0.273652  | 0.187782   |
| C     | -2.149582  | -1.719339  | 0.567338   |
| C     | -2.872656  | 0.21366    | -0.857663  |
| O     | -2.026278  | 0.470325   | 1.399601   |
| O     | -0.467295  | 2.316352   | -0.099732  |
| O     | 3.066512   | -0.832316  | -0.581056  |
| C     | 2.286113   | -0.165397  | 1.616092   |
| H     | 0.600217   | -1.93722   | 0.423484   |
| H     | 1.93879    | 1.274389   | -1.470408  |
| H     | 2.140764   | 1.999661   | 0.126217   |
| H     | 0.640385   | -0.419298  | -2.284543  |
| H     | -0.519365  | -1.731469  | -1.798642  |
| H     | -1.493502  | -2.038939  | 1.377389   |
| H     | -3.182131  | -1.803439  | 0.908048   |
| H     | -2.018851  | -2.393194  | -0.279767  |
| H     | -2.694473  | 1.261559   | -1.103501  |
| H     | -3.886219  | 0.112681   | -0.466252  |

|   |           |           |           |
|---|-----------|-----------|-----------|
| H | -2.792654 | -0.3728   | -1.774327 |
| H | -1.865861 | 1.395873  | 1.182317  |
| H | 3.880619  | -0.376688 | -0.351794 |
| H | 3.182245  | 0.427626  | 1.812714  |
| H | 2.439544  | -1.173177 | 2.004722  |
| H | 1.453216  | 0.291574  | 2.154654  |

| 2-m  |            |            |            |
|------|------------|------------|------------|
| Atom | X axis (Å) | Y axis (Å) | Z axis (Å) |
| C    | 1.974141   | -0.217431  | 0.167853   |
| C    | 0.718177   | -1.021713  | -0.152985  |
| C    | -0.443592  | -0.082163  | -0.387529  |
| C    | 0.145942   | 1.289853   | -0.356195  |
| C    | 1.657313   | 1.194957   | -0.368317  |
| C    | 0.146818   | -0.905095  | -1.523061  |
| C    | -1.859101  | -0.266902  | 0.158782   |
| C    | -1.860147  | 0.037318   | 1.660144   |
| C    | -2.411143  | -1.662138  | -0.087718  |
| O    | -2.739654  | 0.628793   | -0.524913  |
| O    | -0.490254  | 2.321091   | -0.284011  |
| O    | 3.142001   | -0.784446  | -0.406937  |
| C    | 2.206158   | -0.186836  | 1.669358   |
| H    | 0.560929   | -1.944312  | 0.391529   |
| H    | 2.010721   | 1.317465   | -1.395807  |
| H    | 2.098758   | 1.994262   | 0.224782   |
| H    | 0.693037   | -0.394573  | -2.306822  |
| H    | -0.459244  | -1.72853   | -1.871975  |
| H    | -1.504296  | 1.050016   | 1.856925   |
| H    | -2.873674  | -0.052127  | 2.053256   |
| H    | -1.216832  | -0.663932  | 2.195163   |
| H    | -2.538288  | -1.847422  | -1.15422   |
| H    | -3.386949  | -1.750479  | 0.390922   |
| H    | -1.757886  | -2.428587  | 0.331588   |
| H    | -2.344545  | 1.507889   | -0.456647  |
| H    | 2.983638   | -0.92791   | -1.343893  |
| H    | 3.097055   | 0.398745   | 1.900138   |
| H    | 2.340564   | -1.199253  | 2.052708   |
| H    | 1.352878   | 0.26614    | 2.177254   |

| 2-n  |            |            |            |
|------|------------|------------|------------|
| Atom | X axis (Å) | Y axis (Å) | Z axis (Å) |
| C    | 1.989389   | -0.222392  | 0.120297   |
| C    | 0.719746   | -0.979931  | -0.254559  |
| C    | -0.447475  | -0.015744  | -0.347657  |

|   |           |           |           |
|---|-----------|-----------|-----------|
| C | 0.151274  | 1.351266  | -0.179228 |
| C | 1.666961  | 1.236878  | -0.209793 |
| C | 0.115887  | -0.701414 | -1.582299 |
| C | -1.851703 | -0.298657 | 0.164279  |
| C | -2.220223 | -1.781093 | 0.1042    |
| C | -2.884165 | 0.51953   | -0.612638 |
| O | -1.821187 | 0.108496  | 1.539768  |
| O | -0.44492  | 2.39142   | -0.03045  |
| O | 3.11227   | -0.615217 | -0.663632 |
| C | 2.279779  | -0.411167 | 1.604775  |
| H | 0.57521   | -1.957516 | 0.186151  |
| H | 2.017704  | 1.48665   | -1.214177 |
| H | 2.113196  | 1.948937  | 0.482955  |
| H | 0.663979  | -0.107713 | -2.302684 |
| H | -0.503793 | -1.471352 | -2.019725 |
| H | -1.523812 | -2.385564 | 0.685097  |
| H | -3.216341 | -1.9128   | 0.532146  |
| H | -2.254059 | -2.156904 | -0.918957 |
| H | -2.667623 | 1.582635  | -0.530564 |
| H | -3.885332 | 0.327216  | -0.218416 |
| H | -2.876488 | 0.235969  | -1.666665 |
| H | -2.715734 | 0.05346   | 1.885206  |
| H | 3.334882  | -1.522011 | -0.437102 |
| H | 3.162255  | 0.161823  | 1.892868  |
| H | 2.457724  | -1.466229 | 1.82725   |
| H | 1.432107  | -0.077849 | 2.206863  |

## 2-o

| Atom | X axis (Å) | Y axis (Å) | Z axis (Å) |
|------|------------|------------|------------|
| C    | 2.00147    | -0.206436  | 0.135529   |
| C    | 0.736773   | -1.020542  | -0.116365  |
| C    | -0.43925   | -0.082782  | -0.333483  |
| C    | 0.153244   | 1.286549   | -0.309772  |
| C    | 1.660239   | 1.188263   | -0.430684  |
| C    | 0.11821    | -0.92967   | -1.465325  |
| C    | -1.865111  | -0.273119  | 0.189326   |
| C    | -2.149071  | -1.715413  | 0.580438   |
| C    | -2.867897  | 0.205597   | -0.862565  |
| O    | -2.025222  | 0.481288   | 1.394161   |
| O    | -0.465314  | 2.313998   | -0.124456  |
| O    | 3.149022   | -0.789289  | -0.46359   |
| C    | 2.285891   | -0.129031  | 1.6263     |
| H    | 0.604728   | -1.932046  | 0.450959   |
| H    | 1.940191   | 1.265103   | -1.48496   |

|   |           |           |           |
|---|-----------|-----------|-----------|
| H | 2.146251  | 2.005111  | 0.099806  |
| H | 0.634341  | -0.438359 | -2.280771 |
| H | -0.505973 | -1.756694 | -1.775361 |
| H | -1.494463 | -2.029333 | 1.393889  |
| H | -3.182076 | -1.795508 | 0.920619  |
| H | -2.018494 | -2.396301 | -0.261066 |
| H | -2.68952  | 1.251482  | -1.116533 |
| H | -3.882289 | 0.107461  | -0.472634 |
| H | -2.785781 | -0.388439 | -1.774161 |
| H | -1.867191 | 1.405314  | 1.168945  |
| H | 2.958343  | -0.958218 | -1.390255 |
| H | 3.18167   | 0.466147  | 1.808286  |
| H | 2.437742  | -1.129135 | 2.034627  |
| H | 1.44764   | 0.334952  | 2.149289  |

| 2-p  |            |            |            |
|------|------------|------------|------------|
| Atom | X axis (Å) | Y axis (Å) | Z axis (Å) |
| C    | 1.96821    | -0.225975  | 0.150854   |
| C    | 0.714193   | -1.021295  | -0.177884  |
| C    | -0.447764  | -0.074875  | -0.390943  |
| C    | 0.140875   | 1.295222   | -0.337911  |
| C    | 1.652322   | 1.199355   | -0.348106  |
| C    | 0.140504   | -0.880963  | -1.540679  |
| C    | -1.861172  | -0.268055  | 0.15729    |
| C    | -1.857749  | 0.014581   | 1.66304    |
| C    | -2.414132  | -1.659803  | -0.10659   |
| O    | -2.744381  | 0.637509   | -0.510056  |
| O    | -0.494264  | 2.326549   | -0.25379   |
| O    | 3.06141    | -0.820739  | -0.536761  |
| C    | 2.210393   | -0.233747  | 1.656203   |
| H    | 0.556451   | -1.949368  | 0.357178   |
| H    | 2.010163   | 1.336428   | -1.371463  |
| H    | 2.08897    | 1.986329   | 0.265728   |
| H    | 0.701058   | -0.365024  | -2.309201  |
| H    | -0.471688  | -1.694284  | -1.902828  |
| H    | -1.502295  | 1.02491    | 1.872684   |
| H    | -2.869834  | -0.081545  | 2.058553   |
| H    | -1.211674  | -0.693546  | 2.185753   |
| H    | -2.541775  | -1.832028  | -1.175236  |
| H    | -3.389794  | -1.75357   | 0.371576   |
| H    | -1.760866  | -2.43169   | 0.302796   |
| H    | -2.345739  | 1.514513   | -0.435385  |
| H    | 3.867946   | -0.373766  | -0.267178  |
| H    | 3.101505   | 0.347988   | 1.903496   |

|   |          |           |          |
|---|----------|-----------|----------|
| H | 2.34857  | -1.255908 | 2.011715 |
| H | 1.362805 | 0.207335  | 2.185023 |

| 2-q  |            |            |            |
|------|------------|------------|------------|
| Atom | X axis (Å) | Y axis (Å) | Z axis (Å) |
| C    | 1.983642   | -0.237186  | 0.118751   |
| C    | 0.716513   | -0.984817  | -0.255533  |
| C    | -0.446571  | -0.016515  | -0.350631  |
| C    | 0.155333   | 1.350026   | -0.190174  |
| C    | 1.670821   | 1.228939   | -0.227126  |
| C    | 0.111567   | -0.708365  | -1.584105  |
| C    | -1.849922  | -0.293453  | 0.166908   |
| C    | -2.222139  | -1.775308  | 0.117044   |
| C    | -2.882698  | 0.522122   | -0.612276  |
| O    | -1.814838  | 0.122119   | 1.539788   |
| O    | -0.438196  | 2.391455   | -0.040449  |
| O    | 3.055656   | -0.7694    | -0.653192  |
| C    | 2.262274   | -0.402826  | 1.608564   |
| H    | 0.570838   | -1.961318  | 0.185567   |
| H    | 2.016575   | 1.466932   | -1.236095  |
| H    | 2.122183   | 1.946669   | 0.457103   |
| H    | 0.656961   | -0.118414  | -2.309051  |
| H    | -0.510659  | -1.479523  | -2.015618  |
| H    | -1.526476  | -2.377628  | 0.700969   |
| H    | -3.21803   | -1.901851  | 0.547065   |
| H    | -2.258305  | -2.157959  | -0.903481  |
| H    | -2.663341  | 1.585219   | -0.538346  |
| H    | -3.883016  | 0.33516    | -0.213398  |
| H    | -2.879407  | 0.231054   | -1.664267  |
| H    | -2.708228  | 0.069189   | 1.888483   |
| H    | 3.872261   | -0.35751   | -0.359478  |
| H    | 3.157552   | 0.15402    | 1.895614   |
| H    | 2.412465   | -1.456646  | 1.848017   |
| H    | 1.424731   | -0.026472  | 2.199221   |

| 2-r  |            |            |            |
|------|------------|------------|------------|
| Atom | X axis (Å) | Y axis (Å) | Z axis (Å) |
| C    | 1.990203   | -0.230576  | 0.134324   |
| C    | 0.72097    | -0.985633  | -0.236473  |
| C    | -0.442699  | -0.021835  | -0.348699  |
| C    | 0.1591     | 1.347768   | -0.201209  |
| C    | 1.674603   | 1.229277   | -0.238252  |
| C    | 0.118198   | -0.725493  | -1.573409  |
| C    | -1.847992  | -0.293129  | 0.167589   |

|   |           |           |           |
|---|-----------|-----------|-----------|
| C | -2.220425 | -1.775286 | 0.130821  |
| C | -2.878194 | 0.515477  | -0.622161 |
| O | -1.815022 | 0.135797  | 1.536045  |
| O | -0.436764 | 2.38865   | -0.059046 |
| O | 3.138244  | -0.742967 | -0.530796 |
| C | 2.261672  | -0.369769 | 1.623118  |
| H | 0.576201  | -1.959892 | 0.209924  |
| H | 2.016766  | 1.462232  | -1.250461 |
| H | 2.12881   | 1.956352  | 0.433296  |
| H | 0.649728  | -0.13561  | -2.310348 |
| H | -0.497641 | -1.505935 | -1.997023 |
| H | -1.525235 | -2.37284  | 0.720197  |
| H | -3.216366 | -1.897571 | 0.561876  |
| H | -2.25703  | -2.167037 | -0.886237 |
| H | -2.659145 | 1.579193  | -0.556959 |
| H | -3.879617 | 0.331862  | -0.224594 |
| H | -2.871797 | 0.214903  | -1.671467 |
| H | -2.709184 | 0.087911  | 1.883504  |
| H | 2.954665  | -0.776936 | -1.473444 |
| H | 3.157907  | 0.188993  | 1.896612  |
| H | 2.408047  | -1.419359 | 1.882278  |
| H | 1.419617  | 0.017076  | 2.199338  |

| 2-s  |            |            |            |
|------|------------|------------|------------|
| Atom | X axis (Å) | Y axis (Å) | Z axis (Å) |
| C    | 1.987025   | -0.221773  | 0.112103   |
| C    | 0.713267   | -0.97566   | -0.258241  |
| C    | -0.455313  | -0.008063  | -0.350255  |
| C    | 0.148085   | 1.355854   | -0.171243  |
| C    | 1.663798   | 1.239958   | -0.207049  |
| C    | 0.111964   | -0.690095  | -1.58525   |
| C    | -1.864321  | -0.294764  | 0.166497   |
| C    | -2.234418  | -1.775114  | 0.076586   |
| C    | -2.894576  | 0.540575   | -0.583901  |
| O    | -1.938841  | 0.11328    | 1.539012   |
| O    | -0.445625  | 2.395069   | -0.007224  |
| O    | 3.101069   | -0.61224   | -0.685248  |
| C    | 2.295254   | -0.419285  | 1.591728   |
| H    | 0.56987    | -1.956443  | 0.176612   |
| H    | 2.012242   | 1.496715   | -1.2104    |
| H    | 2.112362   | 1.946868   | 0.489433   |
| H    | 0.665609   | -0.0957    | -2.30079   |
| H    | -0.508098  | -1.456228  | -2.028313  |
| H    | -1.541991  | -2.398691  | 0.645651   |

|   |           |           |           |
|---|-----------|-----------|-----------|
| H | -3.230917 | -1.907595 | 0.498934  |
| H | -2.255862 | -2.132329 | -0.953163 |
| H | -2.686011 | 1.601408  | -0.462652 |
| H | -3.893247 | 0.325606  | -0.200245 |
| H | -2.870013 | 0.295996  | -1.646882 |
| H | -1.37197  | -0.467598 | 2.053352  |
| H | 3.324299  | -1.520898 | -0.466894 |
| H | 3.189867  | 0.140652  | 1.867534  |
| H | 2.461872  | -1.477103 | 1.809398  |
| H | 1.46458   | -0.073331 | 2.210257  |

| 2-t  |            |            |            |
|------|------------|------------|------------|
| Atom | X axis (Å) | Y axis (Å) | Z axis (Å) |
| C    | 1.981153   | -0.236526  | 0.11073    |
| C    | 0.709965   | -0.980919  | -0.257976  |
| C    | -0.454268  | -0.009137  | -0.353711  |
| C    | 0.152552   | 1.35437    | -0.183944  |
| C    | 1.667975   | 1.231435   | -0.227839  |
| C    | 0.107687   | -0.699691  | -1.586361  |
| C    | -1.862358  | -0.289047  | 0.169155   |
| C    | -2.23778   | -1.768623  | 0.08878    |
| C    | -2.892327  | 0.545225   | -0.582825  |
| O    | -1.931194  | 0.126675   | 1.539664   |
| O    | -0.438109  | 2.39488    | -0.017857  |
| O    | 3.044212   | -0.769245  | -0.672826  |
| C    | 2.276496   | -0.40726   | 1.596693   |
| H    | 0.565046   | -1.959732  | 0.17921    |
| H    | 2.009898   | 1.473227   | -1.237171  |
| H    | 2.123055   | 1.945734   | 0.457455   |
| H    | 0.658623   | -0.110618  | -2.307833  |
| H    | -0.515299  | -1.467742  | -2.021812  |
| H    | -1.545774  | -2.391501  | 0.659085   |
| H    | -3.233369  | -1.895206  | 0.515082   |
| H    | -2.264007  | -2.13182   | -0.938757  |
| H    | -2.68056   | 1.606108   | -0.467951  |
| H    | -3.89048   | 0.335191   | -0.195169  |
| H    | -2.871541  | 0.294784   | -1.644524  |
| H    | -1.368192  | -0.456272  | 2.055937   |
| H    | 3.864234   | -0.357012  | -0.389239  |
| H    | 3.1837     | 0.136375   | 1.871063   |
| H    | 2.41466    | -1.462983  | 1.834716   |
| H    | 1.45615    | -0.015987  | 2.201844   |

| 2-u |  |  |  |
|-----|--|--|--|
|-----|--|--|--|

| Atom | X axis (Å) | Y axis (Å) | Z axis (Å) |
|------|------------|------------|------------|
| C    | 1.987738   | -0.23018   | 0.125775   |
| C    | 0.714721   | -0.98173   | -0.240673  |
| C    | -0.450144  | -0.014524  | -0.351951  |
| C    | 0.156569   | 1.352147   | -0.194657  |
| C    | 1.672017   | 1.2317     | -0.239474  |
| C    | 0.11392    | -0.715454  | -1.576965  |
| C    | -1.860138  | -0.288743  | 0.169905   |
| C    | -2.235119  | -1.769069  | 0.104192   |
| C    | -2.887556  | 0.53769    | -0.594152  |
| O    | -1.931632  | 0.142032   | 1.535239   |
| O    | -0.436556  | 2.392032   | -0.035331  |
| O    | 3.128927   | -0.743474  | -0.550044  |
| C    | 2.27418    | -0.374357  | 1.611285   |
| H    | 0.570881   | -1.958887  | 0.200652   |
| H    | 2.010062   | 1.468241   | -1.252162  |
| H    | 2.13042    | 1.955216   | 0.433014   |
| H    | 0.64982    | -0.124848  | -2.310209  |
| H    | -0.502555  | -1.49265   | -2.005125  |
| H    | -1.543897  | -2.386235  | 0.681611   |
| H    | -3.231187  | -1.891275  | 0.530596   |
| H    | -2.260579  | -2.142807  | -0.919603  |
| H    | -2.677138  | 1.599718   | -0.487857  |
| H    | -3.887096  | 0.330209   | -0.208785  |
| H    | -2.862148  | 0.277707   | -1.653467  |
| H    | -1.374742  | -0.438742  | 2.060551   |
| H    | 2.936452   | -0.778461  | -1.490905  |
| H    | 3.183072   | 0.169471   | 1.872511   |
| H    | 2.406277   | -1.425922  | 1.869896   |
| H    | 1.449319   | 0.02966    | 2.200671   |
